# Supplementary material for: Synthesis of low to high molecular weight poly(1-hexene); rigid/flexible structures in a di- and mononuclear Ni-based catalyst series
Source: Royal Society of Chemistry journal article supplement (doi:10.1039/c8nj01678j), 2018-01-01
Supplement: c8nj01678j1.pdf [file c8nj01678j1.pdf]

Supporting Information

**Synthesis of low to high molecular weight poly(1-hexene); rigid/flexible structures in a di- and mononuclear Ni-based catalyst series**

M. Khoshsefat,<sup>a,b</sup> S. Ahmadjo,<sup>a,†</sup> S. M. M. Mortazavi,<sup>a</sup> G. H. Zohuri<sup>c</sup> and J. B.P. Soares<sup>b</sup>

<sup>a</sup> Department of Catalyst, Iran Polymer and Petrochemical Institute (IPPI), P.O. Box 14965/115, Tehran, Iran

<sup>b</sup> Department of Chemical and Materials Engineering, University of Alberta, Edmonton, Alberta T6G 1H9, Canada

<sup>c</sup> Department of Chemistry, Faculty of Science, Ferdowsi University of Mashhad, P.O. Box: 91775, Mashhad, Iran

† Corresponding author: S. Ahmadjo ([S.ahmadjo@ippi.ac.ir](mailto:S.ahmadjo@ippi.ac.ir))

**Table of Contents**

|                                                                |       |
|----------------------------------------------------------------|-------|
| Materials and Methods.....                                     | S1    |
| Experimental Details.....                                      | S1-5  |
| Spectroscopic Data of Ligands and corresponding complexes..... | S6-36 |

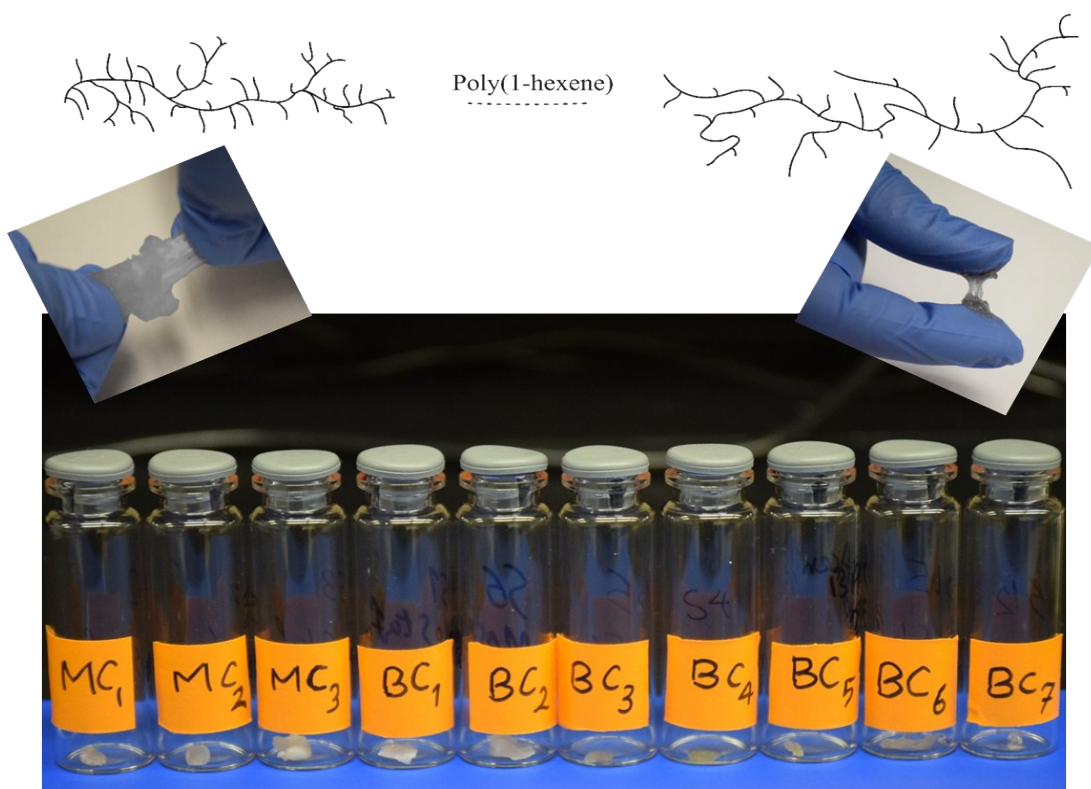

## Materials

All manipulations of air/water sensitive compounds were conducted under Ar/N<sub>2</sub> atmosphere using the standard Schlenk techniques. All the solvents were purified prior to use. Toluene (purity 99.9%) (Iran, Petrochemical Co.) was purified over sodium wire/benzophenone, and used as polymerization media. Dichloromethane (purity 96%) (Sigma Aldrich Chemicals, Germany) and Methanol (Merck chemical) were purified over calcium hydride powder, and distilled prior to use in complex and ligand synthesis as solvent. Xylene was purchased from Merck chemical. 1-Hexene monomer was supplied by Mehr petrochemical company (Iran). 2,4,6-trimethyl aniline, 2,6-diisopropyl aniline, butanedione, 1,4-phenylene diamine, 2,3,5,6-tetramethylphenyldiamine, ethylenediamine, 1,6-Hexanediamine, 4,4'-methylenedianiline, acenaphthoquinone, nickel (II) bromide ethylene glycol dimethyl ether complex [(DME) NiBr<sub>2</sub>] (purity 97%) and diethyl ether (purity 99.5%) were supplied by Merck Chemical (Darmstadt, Germany) and used in synthesis of ligands and catalysts. Diethylaluminum Chloride (DEAC) was supplied by Sigma Aldrich Chemicals (Steinheim, Germany).

## Polymerization procedure

The polymerization of 1-Hexene monomer (purified prior to use) was carried out in a round bottom flask. The polymerization system was conducted under schlenk system before and during the injections. The monomer (10 ml) was injected to the round bottom flask which was contained 10 ml of solvent (toluene). Afterward, the co-catalyst and catalyst were introduced to the flask, respectively. The solution was stirred for 24h. The poly (1-hexene) was precipitated and purified by acidic Methanol (5%) and dried under reduced pressure.

## Characterization

<sup>1</sup>H NMR, <sup>13</sup>C NMR and FT-IR spectrums were obtained using Bruker AC-300, 400 and Thermo Nicolet AVATAR 370 spectrometers, respectively. Elemental and Mass analyses were performed on a Thermo Finnigan Flash 1112EA microanalyzer and Varian CH-7A spectrometer. Intrinsic viscosity [ $\eta$ ] was measured in toluene at room temperature using an Ubbelohde viscometer.  $M_v$  values were calculated according to Mark-Houwink equation,  $\eta = KM_v^\alpha$  ( $\alpha = 0.69$ ,  $K = 2.28 \times 10^{-2}$ ). Molecular weight distributions (MWDs) were determined with a Polymer Char high-temperature gel permeation chromatographer (GPC), run at 145 °C under a flow rate of 1,2,4-trichlorobenzene of 1 mL min<sup>-1</sup>. The GPC was equipped with three detectors in series (infrared, light scattering, and differential viscometer) and calibrated with polystyrene narrow standards.

## Experimental Details

### Preparation of Ligands and catalysts

The ligands (SLM<sub>2</sub>, SL<sub>n</sub>, n=1-10) and complexes (MC<sub>n</sub>, n=1-3 and BC<sub>n</sub>, n=1-7) were synthesized (Scheme S1) according to procedure in our recent reports, expect some modification in the preparation of SL<sub>9</sub> and SL<sub>10</sub> which is described as following.<sup>6,14</sup> Among the structures, five ligands (SL<sub>4</sub> and SL<sub>7-10</sub>) and corresponding complexes (BC<sub>1</sub> and BC<sub>4-7</sub>) are novel.

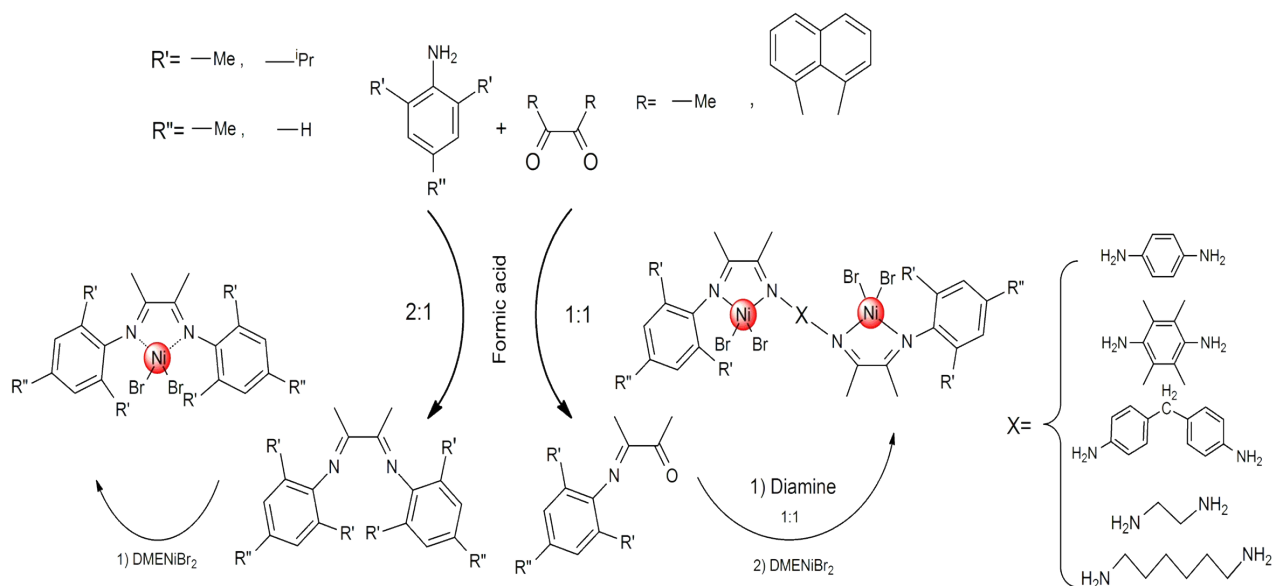

**Scheme S1.** Synthesis route of ligands and catalysts.

| Ligand                   | Structure                                                | Corresponding catalyst |
|--------------------------|----------------------------------------------------------|------------------------|
| <b>1 SLM<sub>2</sub></b> |                                                          | -                      |
| Name:                    | <b>1-(2,6-diisopropylphenylimino)butane-2-one</b>        |                        |
| <b>2 SL<sub>1</sub></b>  |                                                          | <b>MC<sub>1</sub></b>  |
| Name:                    | <b>N,N'-bis(2,4,6-trimethylphenyl)-2,3-butanediimine</b> |                        |
| <b>3 SL<sub>2</sub></b>  |                                                          | <b>MC<sub>2</sub></b>  |
| Name:                    | <b>N,N'-bis(2,6-diisopropylphenyl)-2,3-butanediimine</b> |                        |

| Ligand            | Structure                                                                            | Corresponding catalyst |
|-------------------|--------------------------------------------------------------------------------------|------------------------|
| 4 SL <sub>3</sub> | 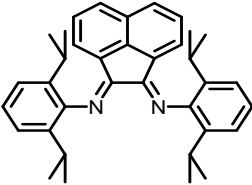    | MC <sub>3</sub>        |
| Name              | N,N'-bis(2,6-diisopropylphenyl)-1,2-acenaphthylenediimine                            |                        |
| 5 SL <sub>4</sub> |     | BC <sub>1</sub>        |
| Name              | N,N'-(tetramethyl-1,4-phenylene)bis(N''-2,4,6-trimethylphenyl)-2,3-butanediimine     |                        |
| 6 SL <sub>5</sub> |    | BC <sub>2</sub>        |
| Name              | N,N'-(tetramethyl-1,4-phenylene)bis(2,6-diisopropylphenyl)-1,2-acenaphthylenediimine |                        |
| 7 SL <sub>6</sub> |   | BC <sub>3</sub>        |
| Name              | N,N'-(1,4-phenylene)bis(2,6-diisopropylphenyl)-1,2-acenaphthylenediimine             |                        |
| 8 SL <sub>7</sub> |  | BC <sub>4</sub>        |
| Name              | N,N'-(methylenebis(4,1-phenylene))bis(N''-(2,6-diisopropylphenyl)-2,3-butanediimine) |                        |

| Ligand              | Structure                                                                                    | Corresponding catalyst |
|---------------------|----------------------------------------------------------------------------------------------|------------------------|
| 9 SL <sub>8</sub>   | 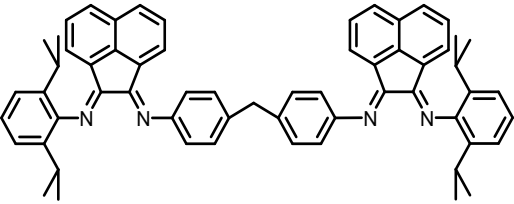           | BC <sub>5</sub>        |
| Name                | N,N'-(methylenebis(4,1-phenylene))bis(N''-(2,6-diisopropylphenyl)-1,2-acenaphthylenediimine) |                        |
| 10 SL <sub>9</sub>  |             | BC <sub>6</sub>        |
| Name                | N,N'-(ethane-1,2-diyl)bis(N''-(2,6-diisopropylphenyl)-2,3-butanediimine)                     |                        |
| 11 SL <sub>10</sub> |          | BC <sub>7</sub>        |
| Name                | N,N'-(hexane-1,6-diyl)bis(N''-(2,6-diisopropylphenyl)-2,3-butanediimine)                     |                        |

#### General procedure for synthesis of ligands (SL<sub>1-3</sub>)

2,4,6-Trimethyl aniline/or 2,6-diisopropylaniline (7 mmol) was added to a stirred solution of diacetyl/ or acenaphthoquinone (0.5 gr, 3 mmol) in methanol (15 ml) and in the presence of catalytic amount of formic acid. The solution was stirred for 48 h. Progress of the reaction was checked by TLC. The solvent was evaporated at the end of the reaction and the precipitate was washed with n-hexane and recrystallized using ethanol.

#### General procedure for synthesis of ligands (SL<sub>4-8</sub>)

To a stirred solution of diacetyl/or acenaphthenequinone (5.3 mmol) and methanol (15 mL) in a round-bottom flask which was placed in an ice bath, 2,4,6-trimethylaniline /or 2,6-diisopropylaniline (5 mmol) was added dropwise in the presence of the catalytic amount of formic acid. The solution was stirred for 24 h. The ice bath was removed and a solution of X=aliphatic or aromatic diamine (2.8 mmol) in methanol (5 mL) was added dropwise. The mixture was stirred for another 24 h at room temperature. In both steps of the ligand synthesis, the reaction progress and consumption of the reactant was checked using TLC

technique. The solid precipitate was washed with cold methanol several times, and the product was purified via column chromatography [10% ethyl acetate (EA)/n-hexane-silica gel]. The solvent was evaporated to afford the final ligands.

#### **Preparation of SLM<sub>2</sub>, SL<sub>9</sub> and SL<sub>10</sub>**

Due to low yield of reported method in synthesis of SL<sub>9</sub> and SL<sub>10</sub>, a modification in method was employed. The first step obtained product of ligand synthesis (SLM<sub>2</sub>) was precipitate at 0 °C and then filtered and washed several time with methanol. The solid was purified via column chromatography [5% ethyl acetate (EA)/n-hexane-silica gel]. The SLM<sub>2</sub> with the molar ratio of 1:3 to the Diamine (ethylene diamine for SL<sub>9</sub> and hexane diamine for SL<sub>10</sub>) was added in a round bottom flask containing xylene as solvent. The mixture was stirred over 72h and then the solid product was washed with cold methanol several times. The solvent was evaporated to afford the product as a dark yellow powder (yield: SL<sub>9</sub> 58% and SL<sub>10</sub> 61%). The solid was purified via column chromatography [10% ethyl acetate (EA)/n-hexane-silica gel].

Table 1. Assignment details of spectroscopic data, SL<sub>n</sub>, n=1-10.

| Entry                        | <sup>1</sup> HNMR (CDCl <sub>3</sub> , 300 MHz): δ                                                                               | Elemental Analysis                                                                                                                 | Ft-IR (KBr, cm <sup>-1</sup> )            | Mass(EIm/z):<br>[M <sup>+</sup> ,100%] |
|------------------------------|----------------------------------------------------------------------------------------------------------------------------------|------------------------------------------------------------------------------------------------------------------------------------|-------------------------------------------|----------------------------------------|
| SL <sub>1</sub>              | 1.2 (6H, s), 1.6(6H, s), 2.0 (6H, s), 2.2 (6H, s), 7.3(4H, s).                                                                   | Anal. Calcd. for C <sub>22</sub> H <sub>28</sub> N <sub>2</sub> : C, 82.45; H, 8.81; N, 8.74. Found: C, 82.38; H, 8.76; N, 8.71.   | 1275 (-C-N-),<br>1646 (-C=N-)             | 320                                    |
| SL <sub>2</sub>              | 1.2 (12H, d), 1.3(12H, d), 2.3 (6H, s), 2.7 (4H, sep), 7.1(4H, d), 7.3 (2H, t).                                                  | Anal. Calc. for C <sub>28</sub> H <sub>40</sub> N <sub>2</sub> : C, 83.11; H, 9.96; N, 6.93. Found: C, 83.02; H, 9.8; N, 6.85.     | 1273 (-C-N-),<br>1646 (-C=N-)             | 404                                    |
| SL <sub>3</sub> <sup>a</sup> | 1.0 (12H, d), 1.3 (12H, d), 3.1 (4H, sep), 6.8 (2H, d) 7.4 (6H, m), 7.7 (2H, t), 8.3 (2H, d).                                    | Anal. Calcd. for C <sub>36</sub> H <sub>40</sub> N <sub>2</sub> : C, 86.35; H, 8.05; N, 5.59. Found: C, 86.18; H, 7.98; N, 5.65.   | 1271 (-C-N-),<br>1626 (-C=N-)             | 500                                    |
| SL <sub>4</sub>              | 1.1(12H, s), 1.5(6H, s), 1.9(12H, s), 2.0(6H, s), 2.1(6H, s), 7.2(4H, s).                                                        | Anal. Calcd. for C <sub>36</sub> H <sub>46</sub> N <sub>4</sub> : C, 80.85; H, 8.67; N, 10.48. Found: C, 79.99; H, 8.54; N, 10.51. | 1283 (-C-N-),<br>1637 (-C=N-)             | 534                                    |
| SL <sub>5</sub> <sup>a</sup> | 1.0(12H, d), 1.3(12H, d), 2.2(12H, s), 3.1(4H, sep), 6.7(4H, d), 7.3(8H, t), 7.9 (4H, t), 8.2(2H, d).                            | Anal. Calcd. For C <sub>58</sub> H <sub>58</sub> N <sub>4</sub> : C, 85.89; H, 7.21; N, 6.91. Found: C, 85.90; H, 7.09; N, 6.98.   | 1279 (-C-N-),<br>1657 (-C=N-)             | 810                                    |
| SL <sub>6</sub> <sup>b</sup> | 1.2(24H, d), 2.8(4H, q), 2.1(6H, s), 6.7(4H, d), 7.3(4H, d), 7.4(2H, t), 7.9 (4H, t), 8.1(4H, d), 8.3(4H, d)                     | Anal. Calcd. For C <sub>54</sub> H <sub>50</sub> N <sub>4</sub> : C, 85.90; H, 6.68; N, 7.42. Found: C, 85.78; H, 6.40; N, 7.07.   | 1274 (-C-N-),<br>1646 (-C=N-)             | 756                                    |
| SL <sub>7</sub>              | 1.1(12H, d), 1.4(12H, d), 2.3(6H, s), 2.5(6H, s), 2.8(2H, sep), 3.8(2H, s), 6.9(4H, d), 7.1 (2H, t), 7.3(4H, d), 7.6(4H, d).     | Anal. Calcd. For C <sub>45</sub> H <sub>56</sub> N <sub>4</sub> : C, 82.77; H, 8.64; N, 8.58. Found: C, 82.12; H, 8.54; N, 8.62.   | 1278 (-C-N-),<br>1655 (-C=N-)             | 652                                    |
| SL <sub>8</sub>              | 1.0(12H, d), 1.3(12H, d), 2.8(4H, sep), 3.8(2H, s), 6.9(4H, d), 7.2 (2H, t), 7.3-7.6(8H, m, overlapped), 7.9(8H, d), 8.2(4H, t). | Anal. Calcd. For C <sub>61</sub> H <sub>56</sub> N <sub>4</sub> : C, 86.69; H, 6.68; N, 6.63. Found: C, 86.58; H, 6.71; N, 6.65.   | 1277 (-C-N-),<br>1678 (-C=N-)             | 844                                    |
| SL <sub>9</sub>              | 1.1(12H, d), 1.3(12H, d), 2.1(4H, t), 2.3(12H, s), 2.7(4H, sep), 7.1(4H, d), 7.3 (2H, t).                                        | Anal. Calcd. For C <sub>34</sub> H <sub>50</sub> N <sub>4</sub> : C, 79.33; H, 9.79; N, 10.88. Found: C, 79.16; H, 9.63; N, 10.93. | 1283 (-C-N-),<br>1650 (-C=N-)             | 514                                    |
| SL <sub>10</sub>             | 1.1-1.3(24H, 2d), 1.5-1.9(8H, m, overlapped), 2.0(4H, t), 2.3(12, s), 2.8(4H, sep), 6.8(4H, d), 7.2 (2H, t).                     | Anal. Calcd. For C <sub>38</sub> H <sub>58</sub> N <sub>4</sub> : C, 79.95; H, 10.24; N, 9.81. Found: C, 80.01; H, 10.07; N, 9.73. | 1274 (-C-N-),<br>1655 (-C=N-)             | 570                                    |
| SLM <sub>2</sub>             | 1.2(6H, d), 1.4(6H, d), 2.1(3H, s), 2.3(3H, s), 2.9(2H, sep), 6.9(2H, d), 7.2 (1H, t).                                           | Anal. Calcd. for C <sub>16</sub> H <sub>23</sub> NO: C, 78.32; H, 9.45; N, 5.71. Found: C, 77.92; H, 9.11; N, 5.31.                | 1271 (-C-N-),1621 (-C=N-),<br>1720 (-C=O) | 245                                    |

<sup>a,b</sup> Data extracted from our reports.<sup>6, 14</sup>

Table 2. Assignment details of spectroscopic data, MC<sub>n</sub>, n=1-3 and BC<sub>n</sub>, n=1-7.

| Entry                             | Elemental Analysis                                                                                                                                                  | Ft-IR (KBr, cm <sup>-1</sup> )                                                                              |
|-----------------------------------|---------------------------------------------------------------------------------------------------------------------------------------------------------------------|-------------------------------------------------------------------------------------------------------------|
| <b>MC<sub>1</sub></b>             | Anal. Calcd. for C <sub>22</sub> H <sub>28</sub> Br <sub>2</sub> N <sub>2</sub> Ni: C, 49.03; H, 5.24; N, 5.20.<br>Found: C, 48.29; H, 4.91; N, 4.23.               | the imine signal was shifted to weak field as it coordinated to the Ni atom; 1638 cm <sup>-1</sup> (-C=N-). |
| <b>MC<sub>2</sub></b>             | Anal. Calcd. for C <sub>28</sub> H <sub>40</sub> Br <sub>2</sub> N <sub>2</sub> Ni: C, 53.97; H, 6.47; N, 4.50.<br>Found: C, 53.24; H, 4.23; N, 4.17.               | the imine signal was shifted to weak field as it coordinated to the Ni atom; 1642 cm <sup>-1</sup> (-C=N-). |
| <b>MC<sub>3</sub><sup>a</sup></b> | Anal. Calcd. for C <sub>36</sub> H <sub>40</sub> Br <sub>2</sub> N <sub>2</sub> Ni: C, 60.12; H, 5.61; N, 3.89.<br>Found: C, 59.89; H, 5.54; N, 3.91.               | the imine signal was shifted to weak field as it coordinated to the Ni atom; 1625 cm <sup>-1</sup> (-C=N-). |
| <b>BC<sub>1</sub></b>             | Anal. Calcd. for C <sub>36</sub> H <sub>46</sub> Br <sub>4</sub> N <sub>4</sub> Ni <sub>2</sub> : C, 44.49; H, 4.77; N, 5.77.<br>Found: C, 44.32; H, 4.56; N, 5.67. | the imine signal was shifted to weak field as it coordinated to the Ni atom; 1622 cm <sup>-1</sup> (-C=N-). |
| <b>BC<sub>2</sub><sup>a</sup></b> | Anal. Calcd. for C <sub>58</sub> H <sub>58</sub> Br <sub>4</sub> N <sub>4</sub> Ni <sub>2</sub> : C, 55.81; H, 4.68; N, 4.49.<br>Found: C, 55.64; H, 4.21; N, 4.06. | the imine signal was shifted to weak field as it coordinated to the Ni atom; 1652 cm <sup>-1</sup> (-C=N-). |
| <b>BC<sub>3</sub><sup>b</sup></b> | Anal. Calcd. for C <sub>54</sub> H <sub>50</sub> Br <sub>4</sub> N <sub>4</sub> Ni <sub>2</sub> : C, 54.4; H, 4.2; N, 4.7. Found: C, 53.81; H, 4.05; N, 4.30.       | the imine signal was shifted to weak field as it coordinated to the Ni atom; 1623 cm <sup>-1</sup> (-C=N-). |
| <b>BC<sub>4</sub></b>             | Anal. Calcd. for C <sub>46</sub> H <sub>60</sub> Br <sub>4</sub> N <sub>4</sub> Ni <sub>2</sub> : C, 49.59; H, 5.18; N, 5.14.<br>Found: C, 49.33; H, 4.97; N, 4.89. | the imine signal was shifted to weak field as it coordinated to the Ni atom; 1649 cm <sup>-1</sup> (-C=N-). |
| <b>BC<sub>5</sub></b>             | Anal. Calcd. for C <sub>61</sub> H <sub>56</sub> Br <sub>4</sub> N <sub>4</sub> Ni <sub>2</sub> : C, 57.14; H, 4.40; N, 4.37.<br>Found: C, 56.93; H, 4.24; N, 4.21. | the imine signal was shifted to weak field as it coordinated to the Ni atom; 1674 cm <sup>-1</sup> (-C=N-). |
| <b>BC<sub>6</sub></b>             | Anal. Calcd. for C <sub>34</sub> H <sub>50</sub> Br <sub>4</sub> N <sub>4</sub> Ni <sub>2</sub> : C, 42.90; H, 5.29; N, 5.89.<br>Found: C, 42.69; H, 5.15; N, 5.72. | the imine signal was shifted to weak field as it coordinated to the Ni atom; 1638 cm <sup>-1</sup> (-C=N-). |
| <b>BC<sub>7</sub></b>             | Anal. Calcd. for C <sub>38</sub> H <sub>58</sub> Br <sub>4</sub> N <sub>4</sub> Ni <sub>2</sub> : C, 45.28; H, 5.80; N, 5.56.<br>Found: C, 44.99; H, 5.67; N, 5.53. | the imine signal was shifted to weak field as it coordinated to the Ni atom; 1652 cm <sup>-1</sup> (-C=N-). |

<sup>a,b</sup> Data extracted from our reports<sup>6, 14</sup>



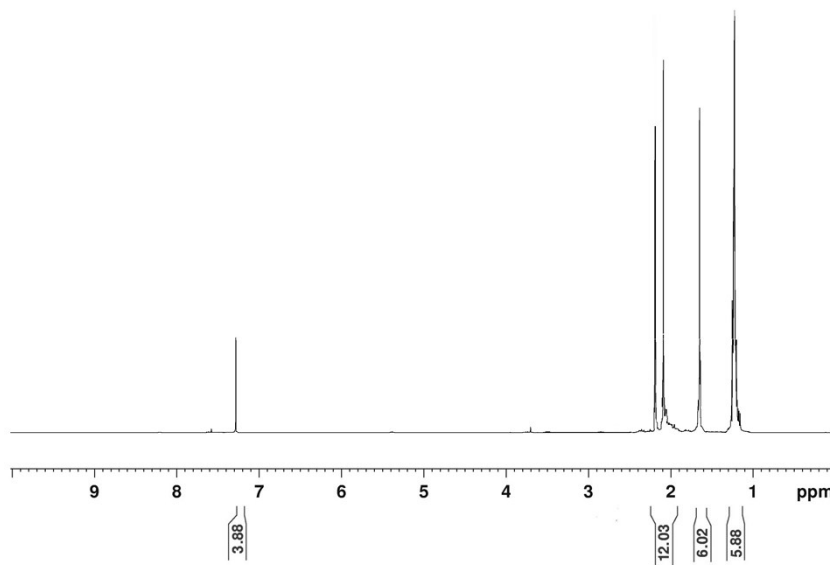

**Figure S1.** <sup>1</sup>H NMR spectrum of SL<sub>1</sub>.

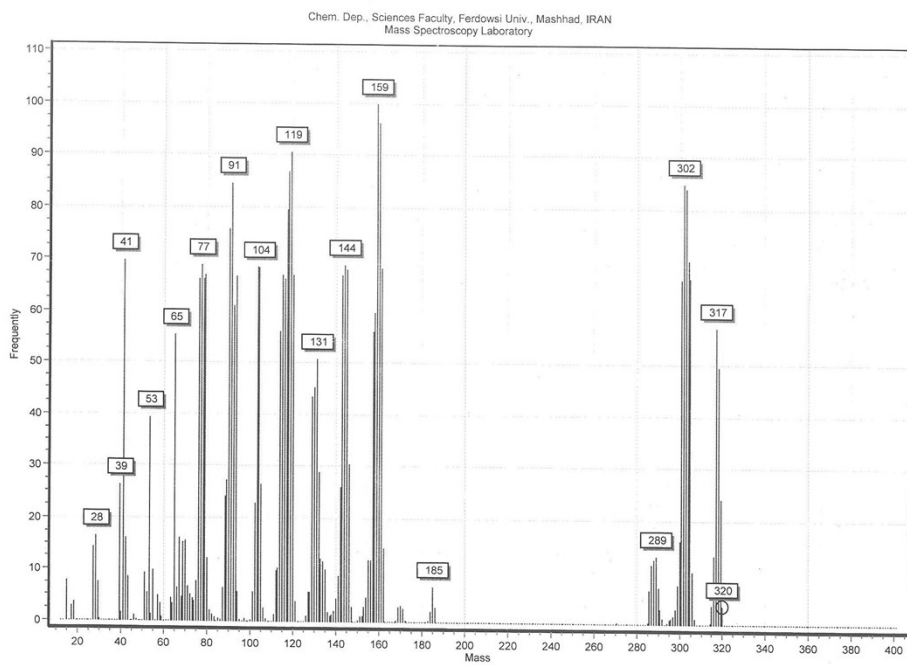

**Figure S2.** Mass spectrum of SL<sub>1</sub>.

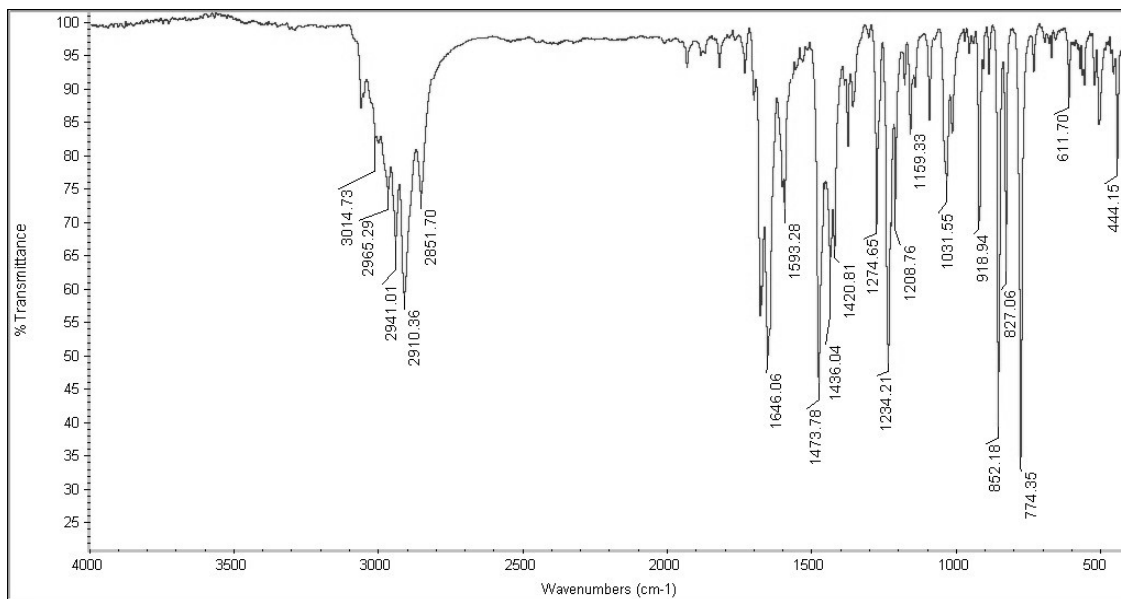

**Figure S3.** FT-IR spectrum of SL<sub>1</sub>

**Eager 300 Summarize Results**

Method Name : NCHS  
 Method Filename : Copy of Copy of N C H S-bkp .mth

1 Sample(s) in Group No : 8

| Component Name | Average     |
|----------------|-------------|
| Nitrogen%      | 8.714814548 |
| Carbon%        | 82.38718384 |
| Hydrogen%      | 8.758033085 |
| Sulphur%       | 0           |

**Figure S4.** CHNS elemental analysis of SL<sub>1</sub>.

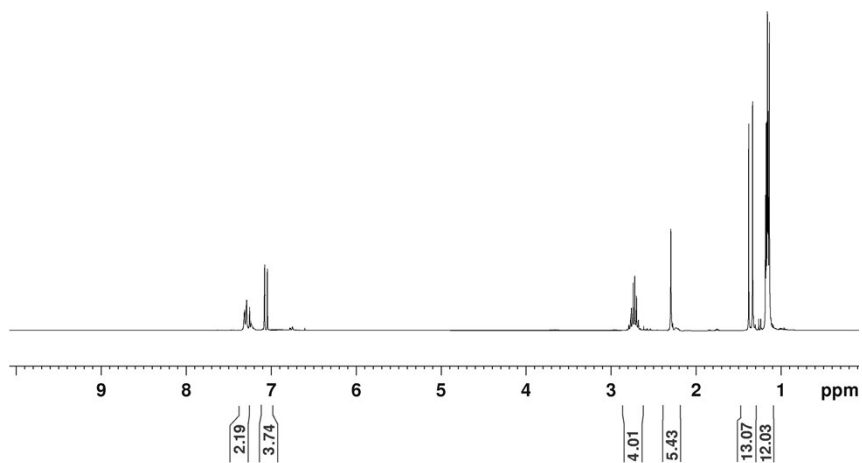

**Figure S5.** <sup>1</sup>H NMR spectrum of SL<sub>2</sub>.

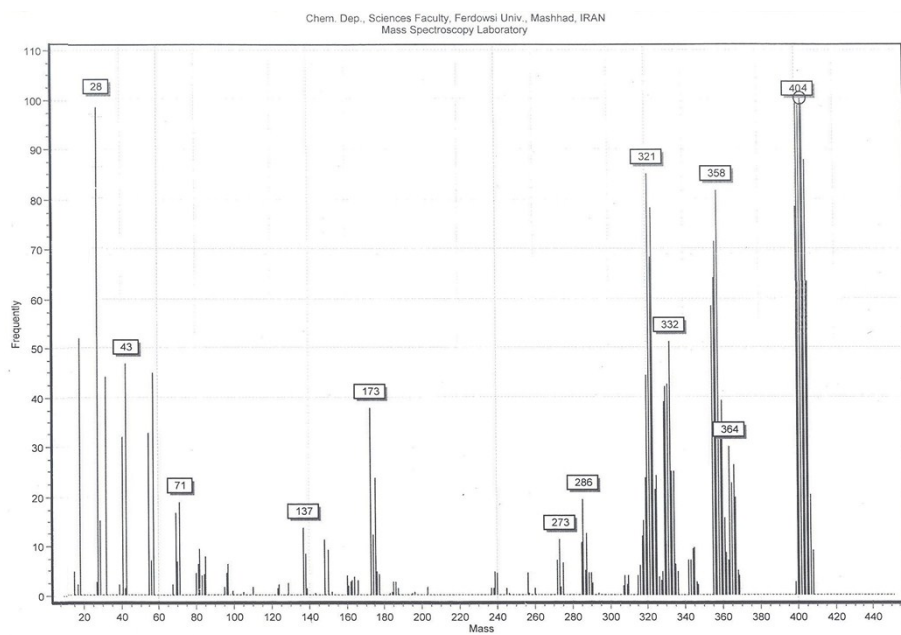

**Figure S6.** Mass spectrum of SL<sub>2</sub>.

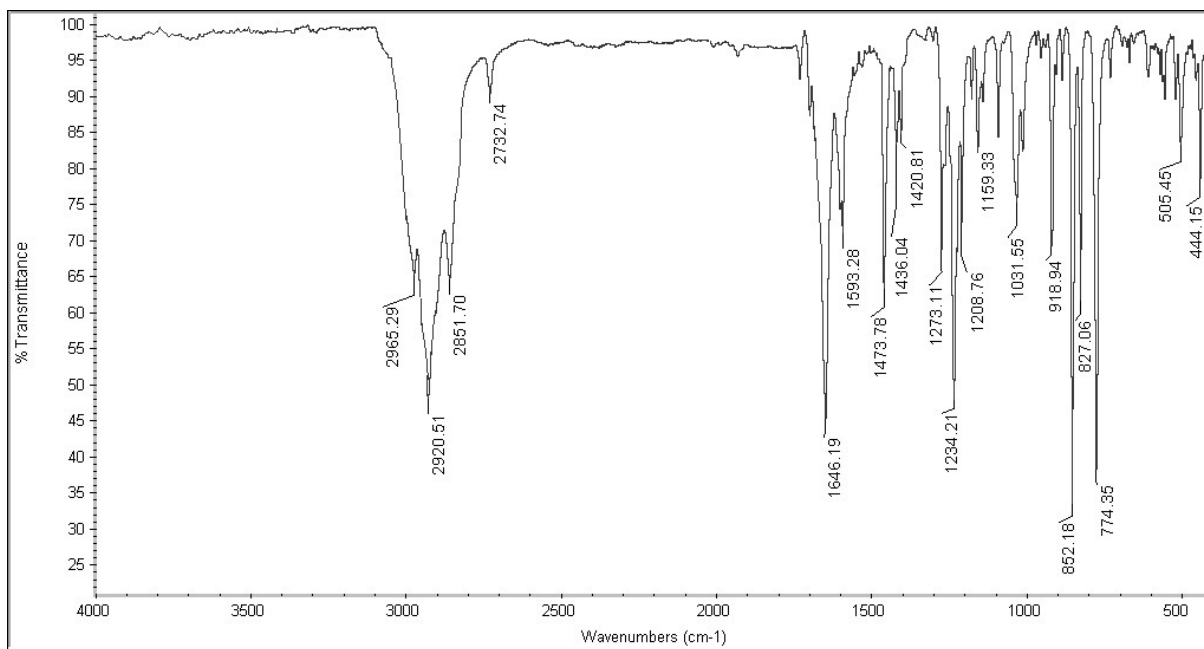

Figure S7. FT-IR spectrum of SL<sub>2</sub>.

### Eager 300 Summarize Results

Method Name : NCHS

Method Filename : Copy of Copy of N C H S-bkp .mth

1 Sample(s) in Group No : 5

Component Name Average

```

-----
Nitrogen%      6.85373567
Carbon%        83.021343
Hydrogen%      9.837661972
Sulphur%       0
  
```

Figure S8. CHNS elemental analysis of SL<sub>2</sub>.

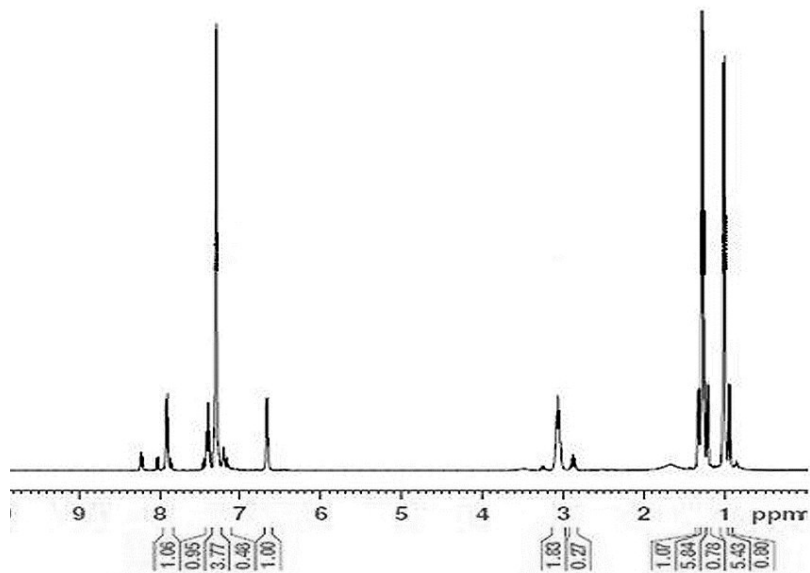

Figure S9.  $^1\text{H}$  NMR spectrum of  $\text{SL}_3$ .

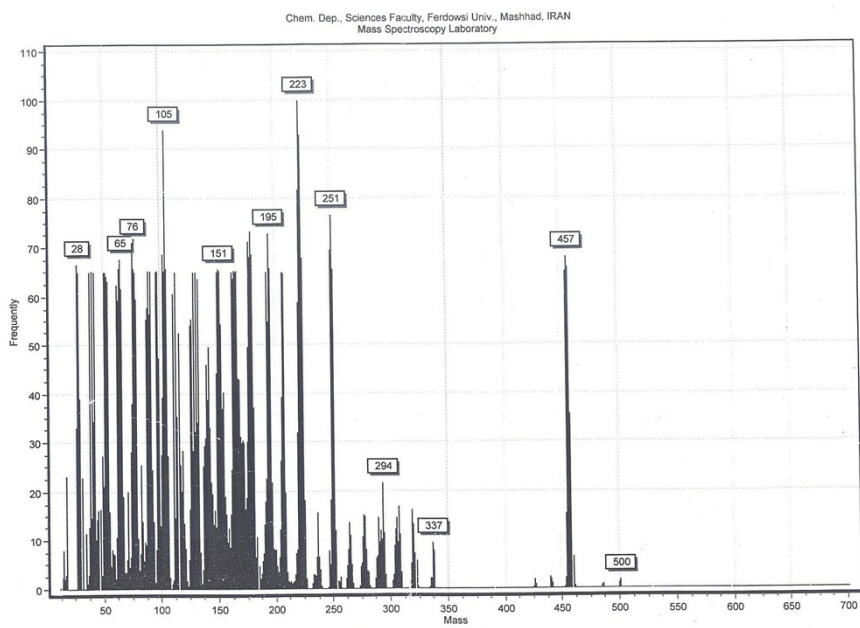

Figure S10. Mass spectrum of  $\text{SL}_3$ .

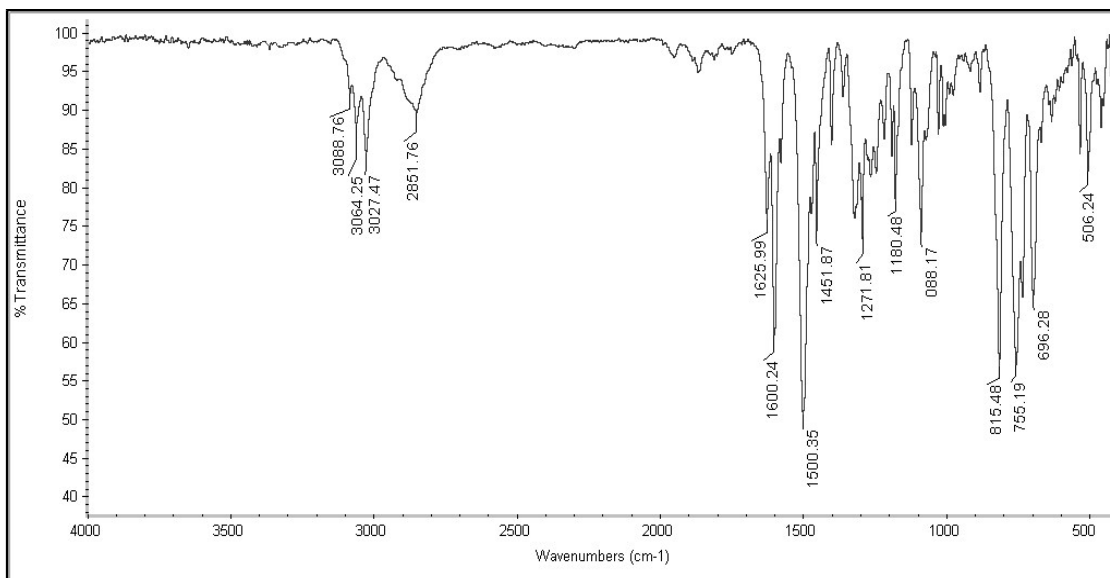

Figure S11. FT-IR spectrum of SL<sub>3</sub>.

### Eager 300 Summarize Results

Method Name : NCHS

Method Filename : Copy of Copy of N C H S-bkp .mth

1 Sample(s) in Group No : 6

Component Name Average

| Component Name | Average     |
|----------------|-------------|
| Nitrogen%      | 5.64713604  |
| Carbon%        | 86.18475183 |
| Hydrogen%      | 7.98096756  |
| Sulphur%       | 0           |

Figure S12. CHNS elemental analysis of SL<sub>3</sub>.

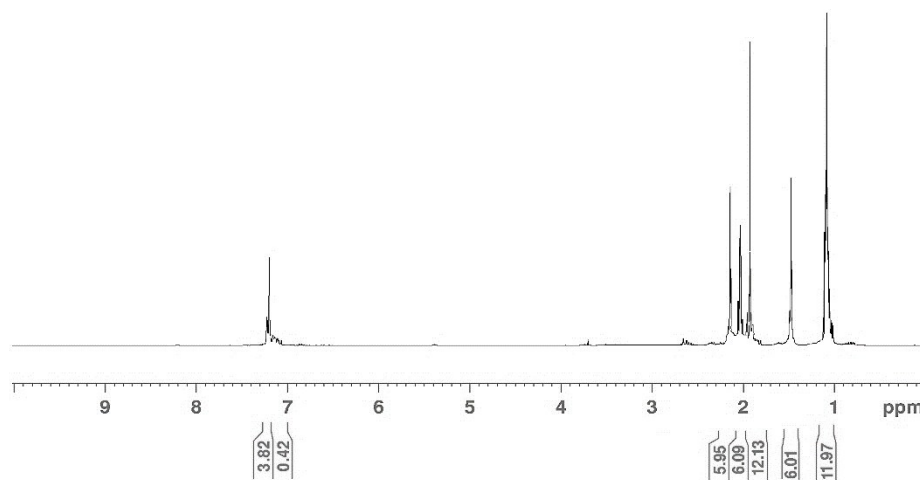

**Figure S13.** <sup>1</sup>H NMR spectrum of SL<sub>4</sub>.

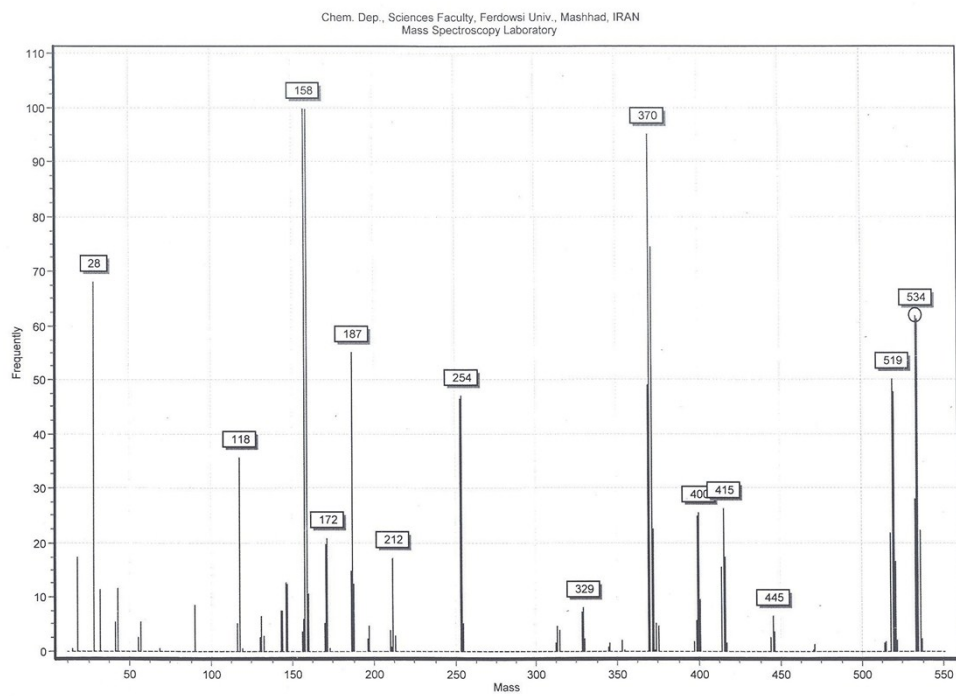

**Figure S14.** Mass spectrum of SL<sub>4</sub>.

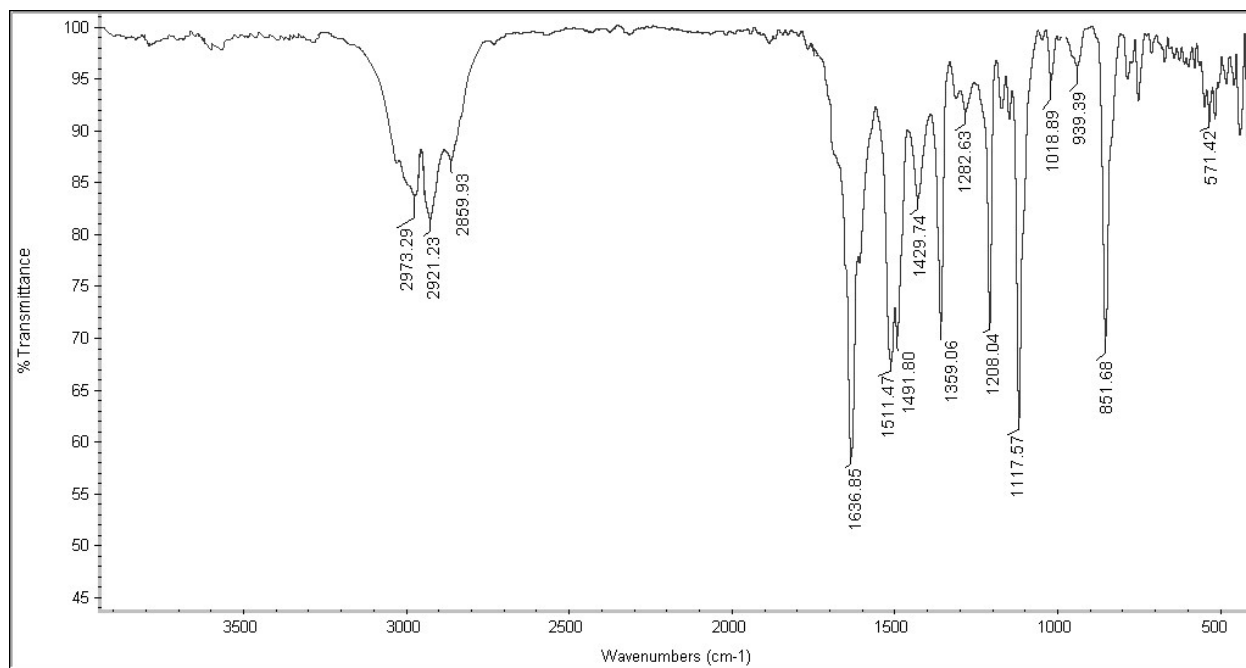

**Figure S15.** FT-IR spectrum of SL<sub>4</sub>.

**Eager 300 Summarize Results**

Method Name : NCHS  
 Method Filename : Copy of Copy of N C H S-bkp .mth

1 Sample(s) in Group No : 2

Component Name Average  
 -----

|           |             |
|-----------|-------------|
| Nitrogen% | 10.51360663 |
| Carbon%   | 79.98844215 |
| Hydrogen% | 8.542706966 |
| Sulphur%  | 0           |

**Figure S16.** CHNS elemental analysis of SL<sub>4</sub>.



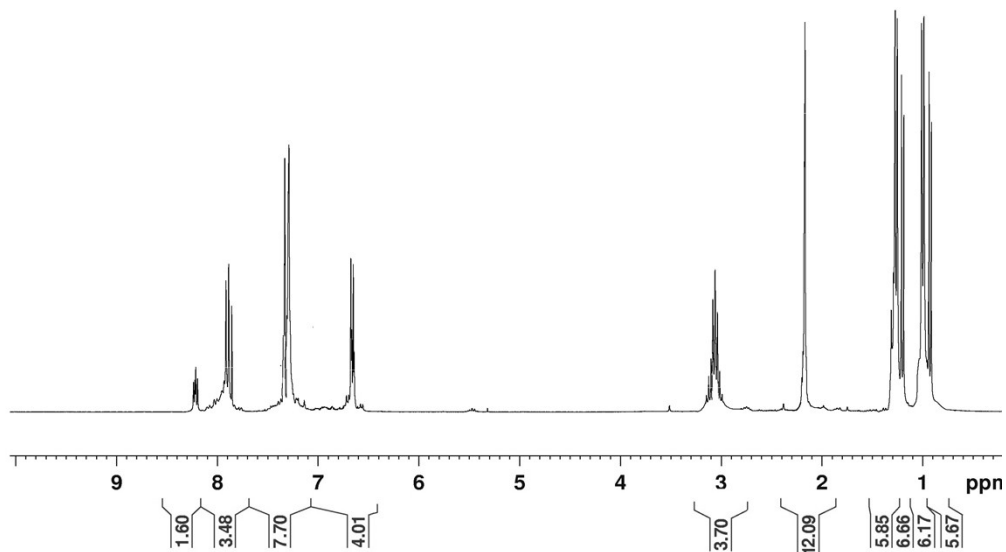

Figure S17. <sup>1</sup>H NMR spectrum of SL<sub>5</sub>.

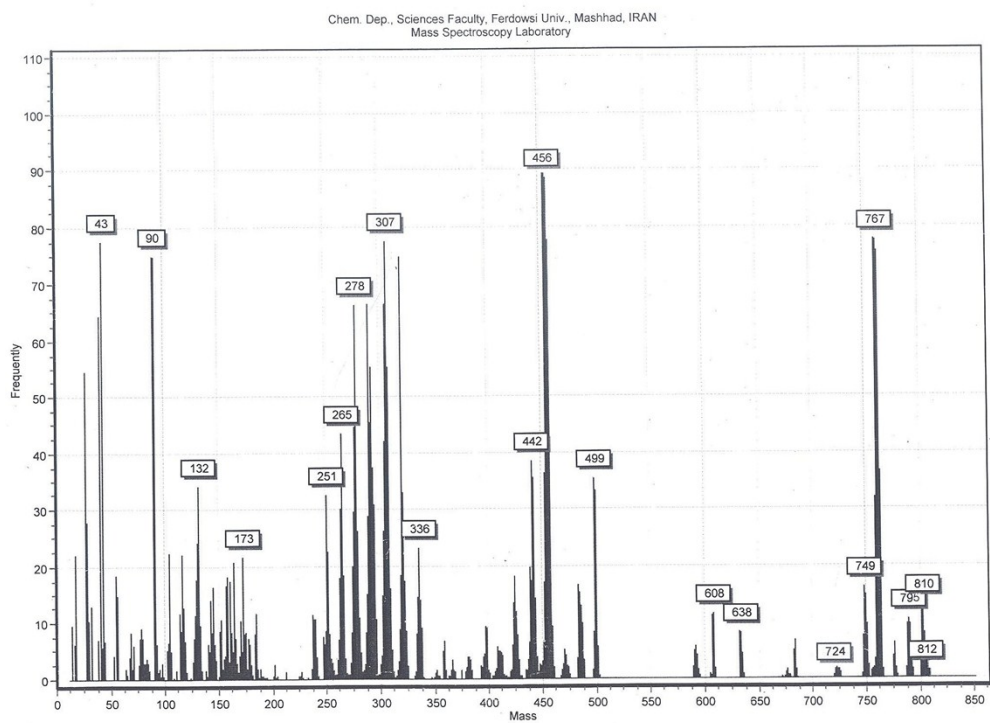

Figure S18. Mass spectrum of SL<sub>5</sub>.

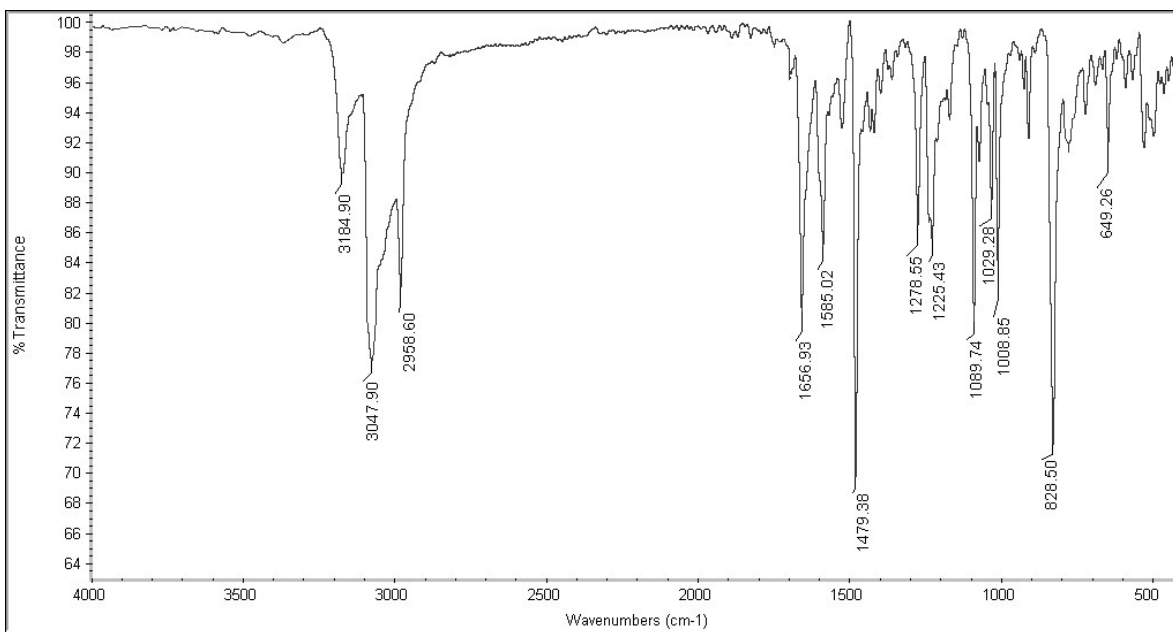

**Figure S19.** FT-IR spectrum of SL<sub>5</sub>.

**Eager 300 Summarize Results**

Method Name : NCHS

Method Filename : Copy of Copy of N C H S-bkp .mth

1 Sample(s) in Group No : 9

Component Name Average

| Component Name | Average     |
|----------------|-------------|
| Nitrogen%      | 6.982901459 |
| Carbon%        | 85.90104645 |
| Hydrogen%      | 7.091677689 |
| Sulphur%       | 0           |

**Figure S20.** CHNS elemental analysis of SL<sub>5</sub>.

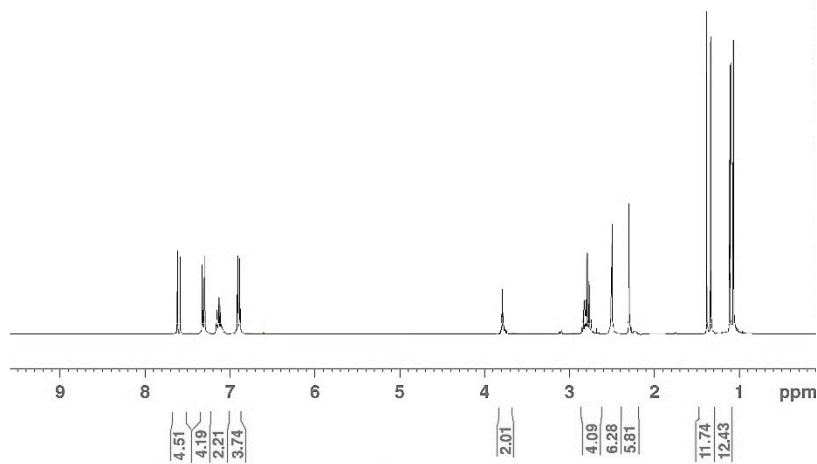

**Figure S21.** <sup>1</sup>H NMR spectrum of SL<sub>7</sub>.

Chem. Dep., Sciences Faculty, Ferdowsi Univ., Mashhad, IRAN  
Mass Spectroscopy Laboratory

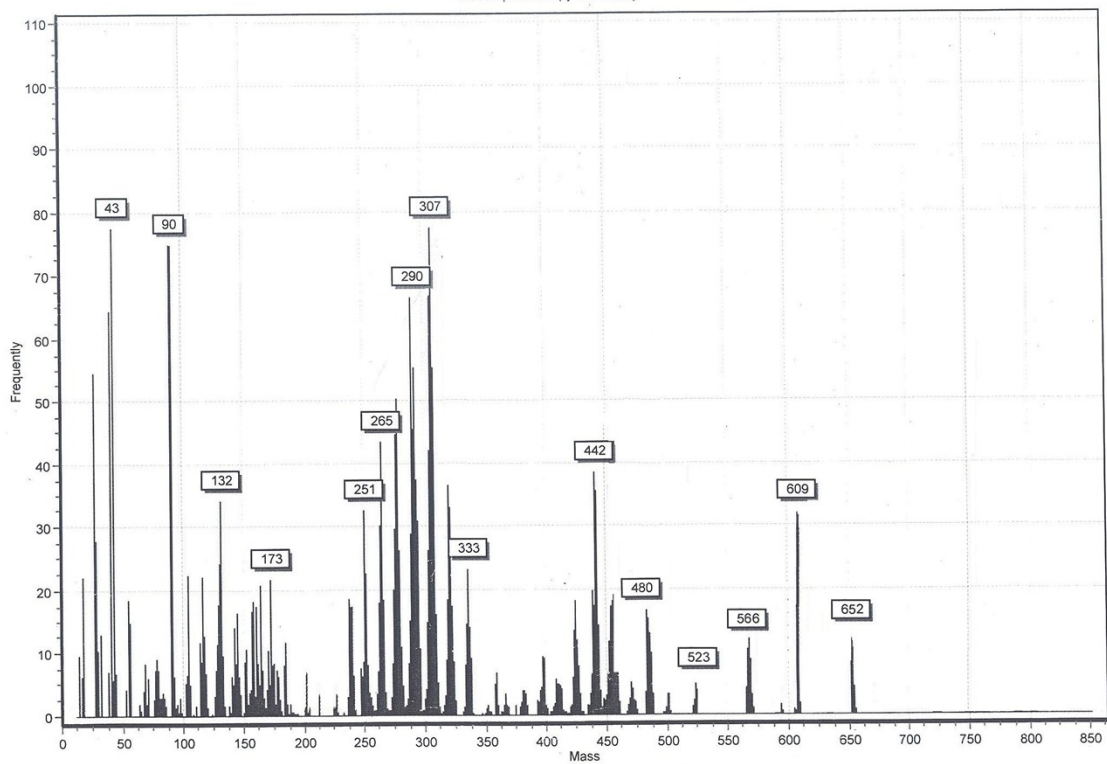

**Figure S22.** Mass spectrum of SL<sub>7</sub>.

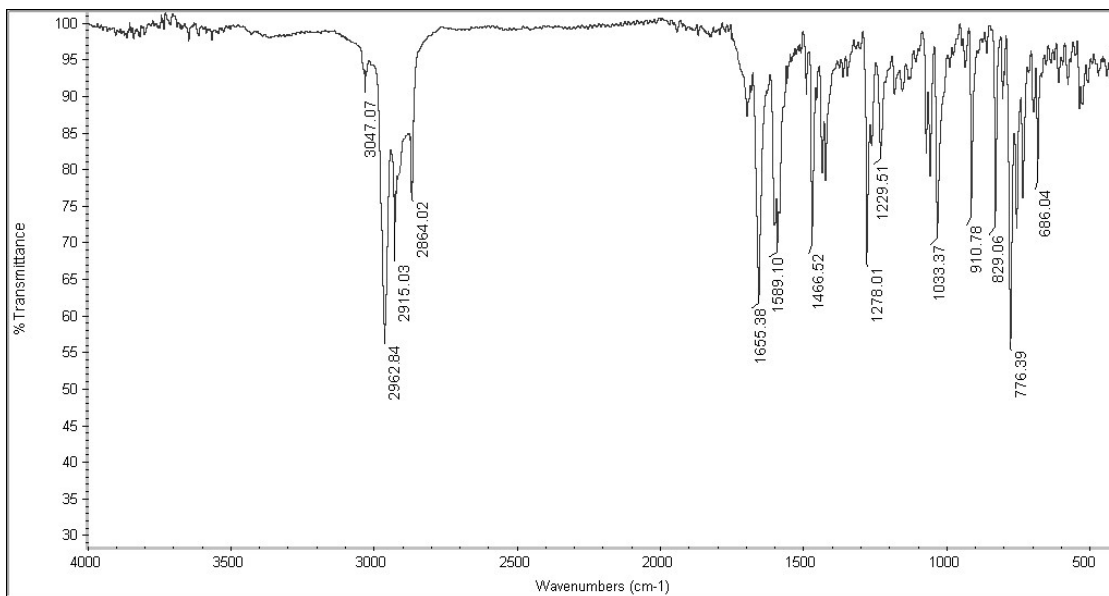

Figure S23. FT-IR spectrum of SL<sub>7</sub>.

Eager 300 Summarize Results

Method Name : NCHS  
 Method Filename : Copy of Copy of N C H S-bkp .mth

1 Sample(s) in Group No : 7

Component Name Average

| Component Name | Average     |
|----------------|-------------|
| Nitrogen%      | 8.621598478 |
| Carbon%        | 82.12136176 |
| Hydrogen%      | 8.539784489 |
| Sulphur%       | 0           |

Figure S24. CHNS elemental analysis of SL<sub>7</sub>.

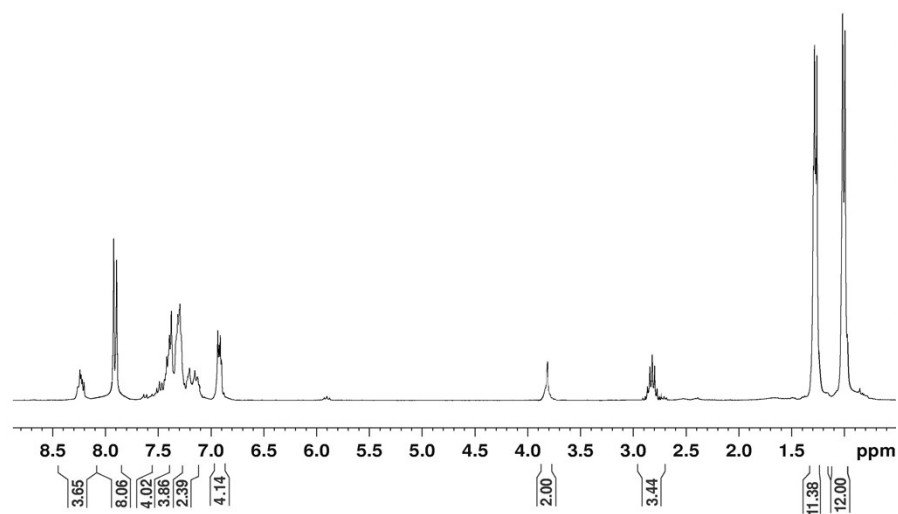

Figure S25. <sup>1</sup>H NMR spectrum of SL<sub>8</sub>.

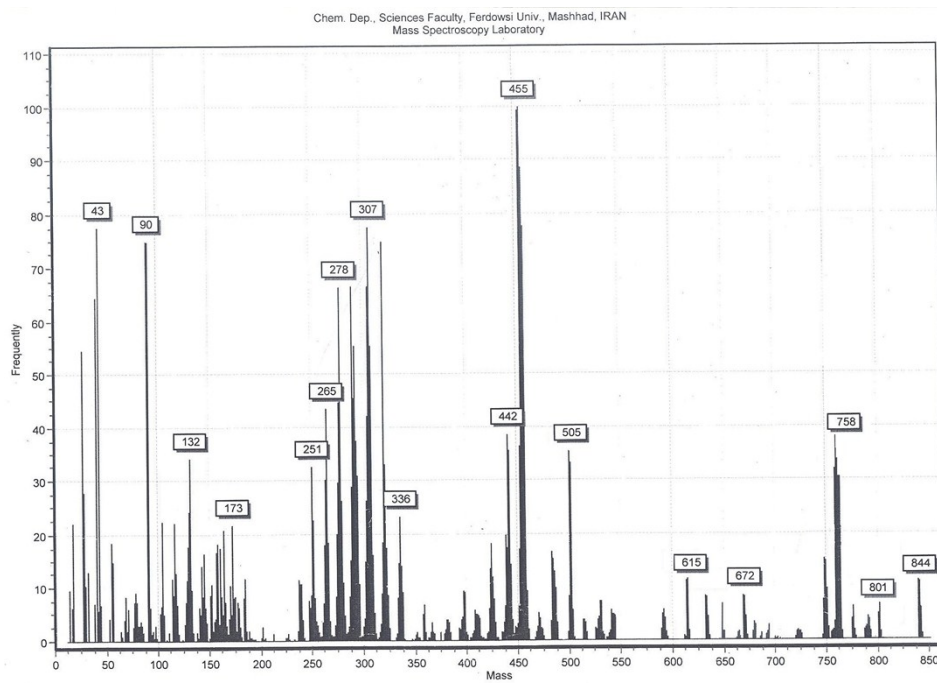

Figure S26. Mass spectrum of SL<sub>8</sub>.

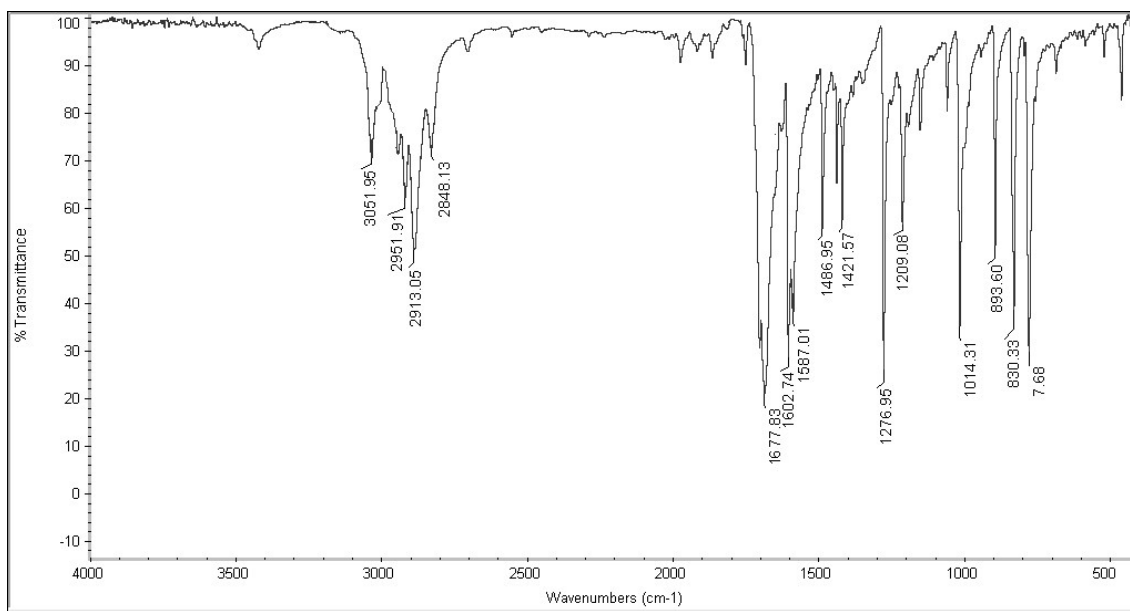

Figure S27. FT-IR spectrum of SL<sub>8</sub>.

Eager 300 Summarize Results

Method Name : NCHS

Method Filename : Copy of Copy of N C H S-bkp .mth

8 1 Sample(s) in Group No : 12

Component Name Average

| Component Name | Average     |
|----------------|-------------|
| Nitrogen%      | 6.652806184 |
| Carbon%        | 86.58144204 |
| Hydrogen%      | 6.712966966 |
| Sulphur%       | 0           |

Figure S28. CHNS elemental analysis of SL<sub>8</sub>.

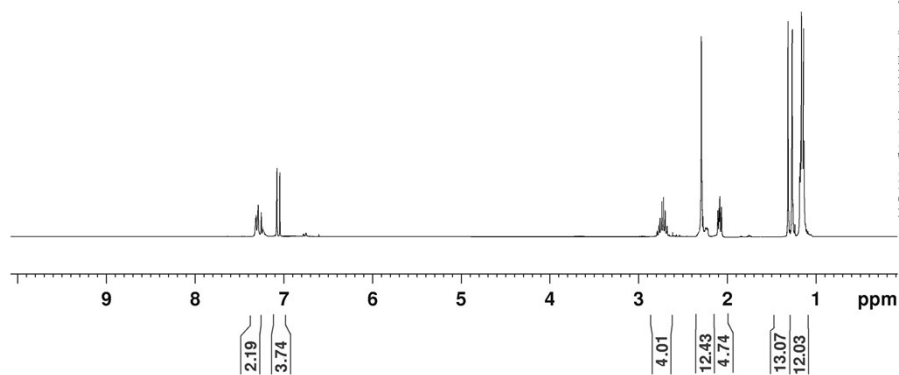

**Figure S29.** <sup>1</sup>H NMR spectrum of SL<sub>9</sub>.

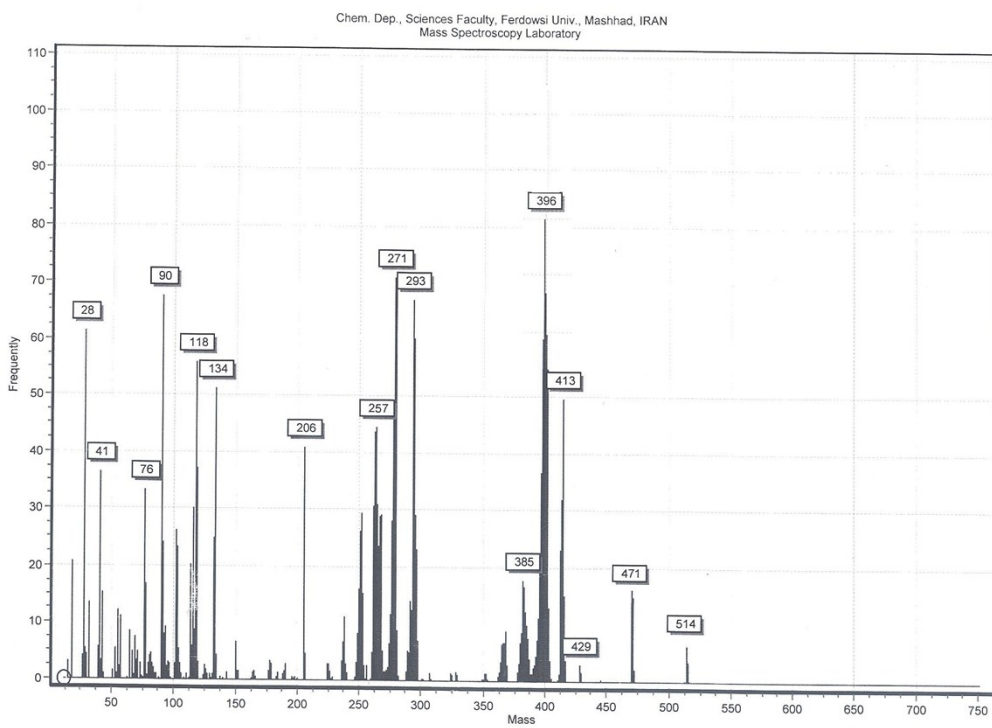

**Figure S30.** Mass spectrum of SL<sub>9</sub>.

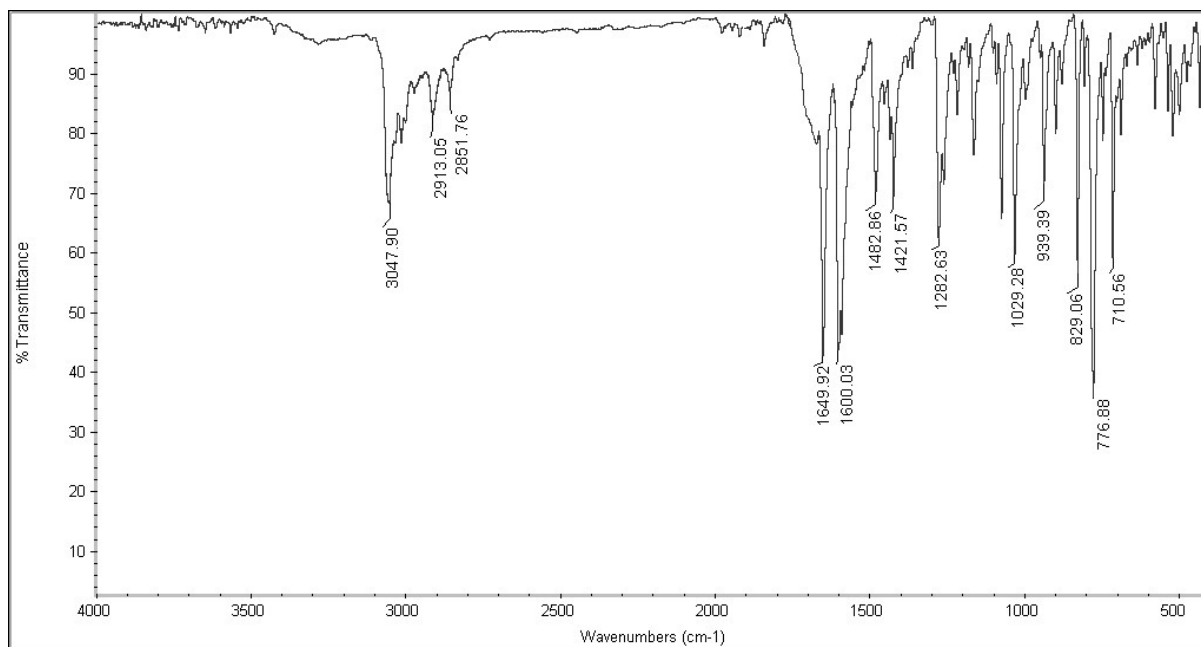

Figure S31. FT-IR spectrum of SL<sub>9</sub>.

Eager 300 Summarize Results

Method Name : NCHS

Method Filename : Copy of Copy of N C H S-bkp .mth

8 1 Sample(s) in Group No : 16

Component Name Average

| Component Name | Average      |
|----------------|--------------|
| Nitrogen%      | 10.934591658 |
| Carbon%        | 79.16179816  |
| Hydrogen%      | 9.627678101  |
| Sulphur%       | 0            |

Figure S32. CHNS elemental analysis of SL<sub>9</sub>.



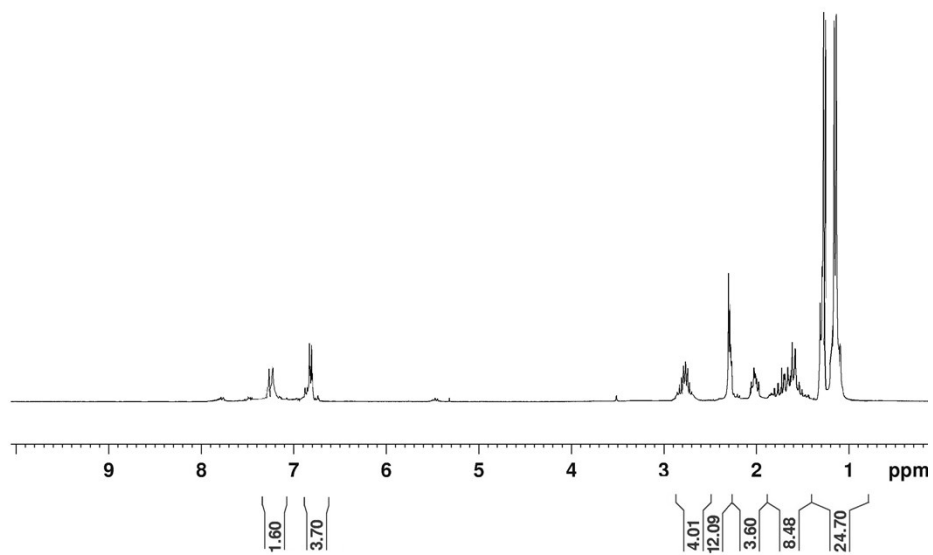

Figure S33. <sup>1</sup>H NMR spectrum of SL<sub>10</sub>.

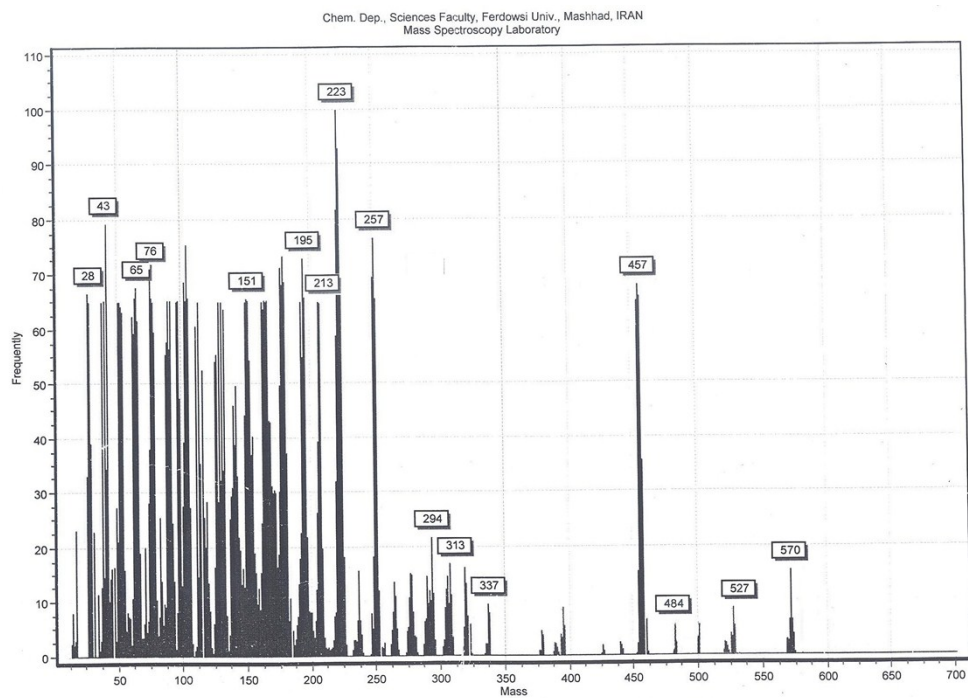

Figure S34. Mass spectrum of SL<sub>10</sub>.

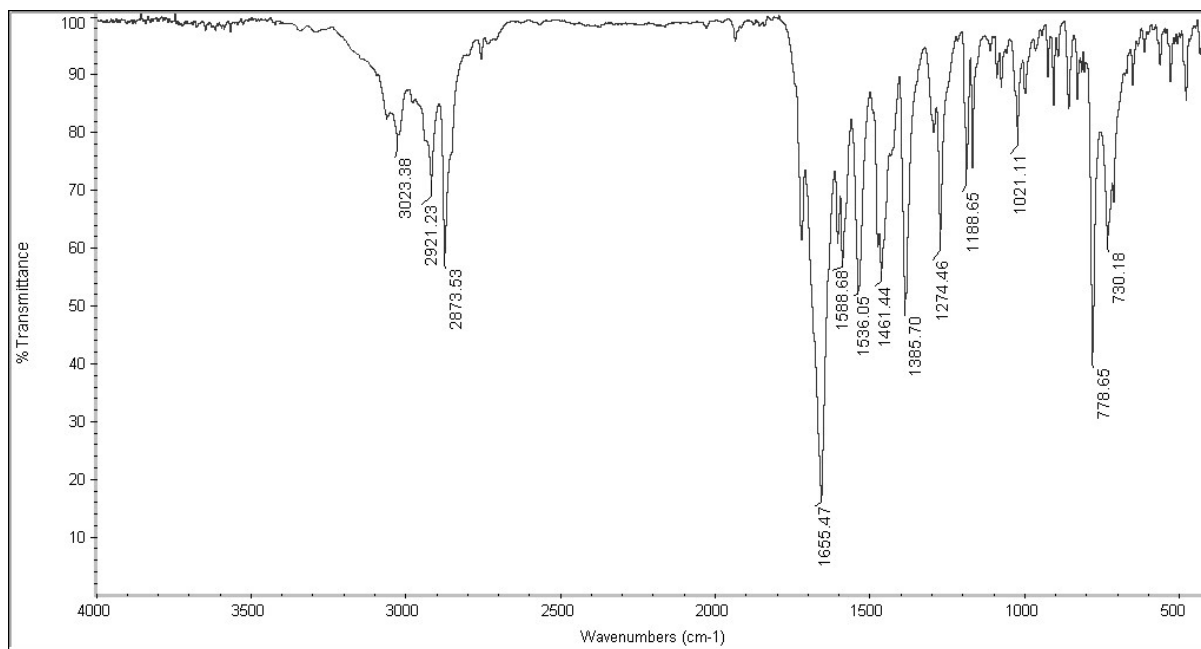

Figure S35. FT-IR spectrum of SL<sub>10</sub>.

Eager 300 Summarize Results

Method Name : NCHS  
 Method Filename : Copy of Copy of N C H S-bkp .mth

8 1 Sample(s) in Group No : 18  
 Component Name Average

| Component Name | Average     |
|----------------|-------------|
| Nitrogen%      | 9.732784412 |
| Carbon%        | 80.00736176 |
| Hydrogen%      | 10.07419878 |
| Sulphur%       | 0           |

Figure S36. CHNS elemental analysis of SL<sub>10</sub>.

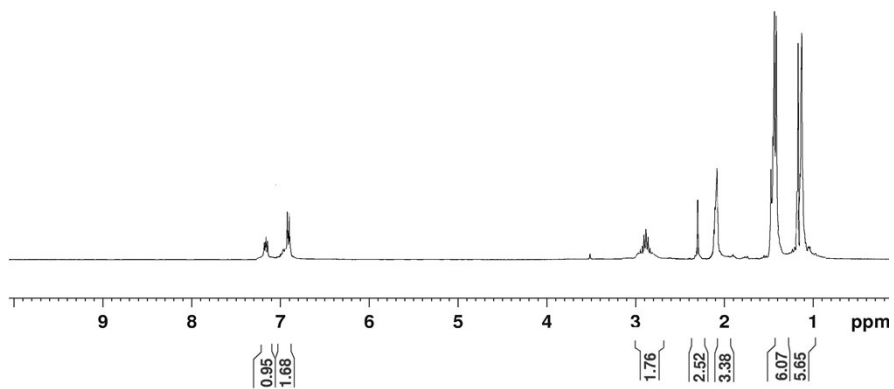

**Figure S37.** <sup>1</sup>H NMR spectrum of SLM<sub>2</sub>.

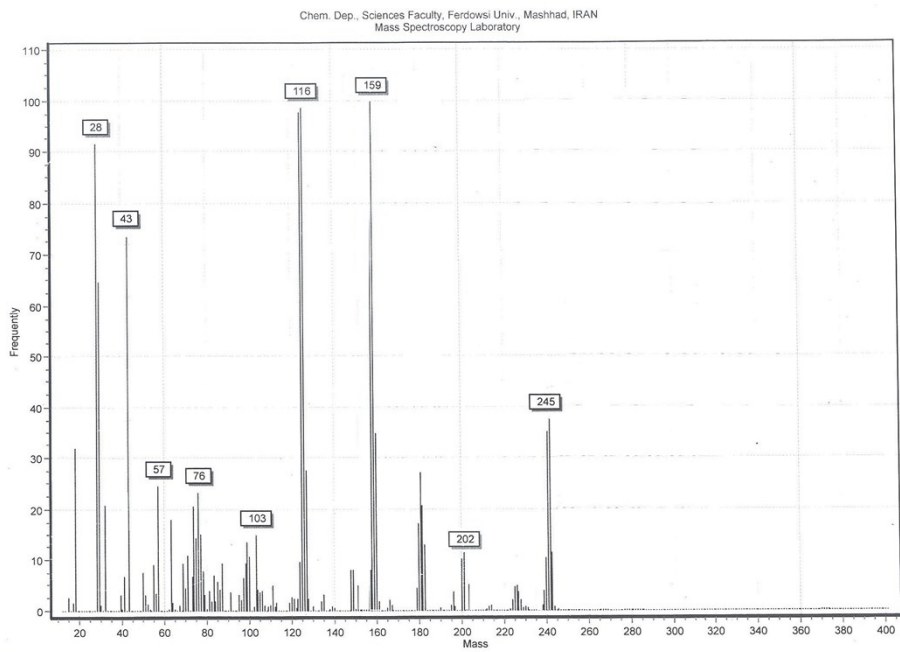

**Figure S38.** Mass spectrum of SLM<sub>2</sub>.

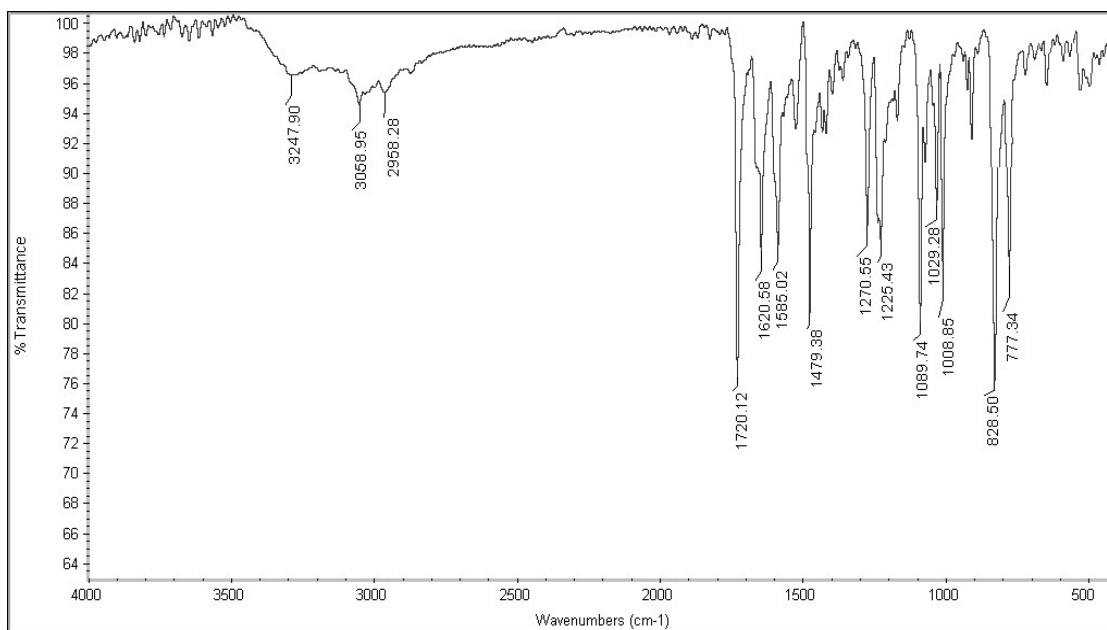

**Figure S39.** FT-IR spectrum of SLM<sub>2</sub>

Eager 300 Summarize Results

Method Name : NCHS  
 Method Filename : Copy of Copy of N C H S-bkp .mth

8 1 Sample(s) in Group No : 11  
 Component Name Average

|           |             |
|-----------|-------------|
| Nitrogen% | 5.312901485 |
| Carbon%   | 77.92104611 |
| Hydrogen% | 9.117677601 |
| Sulphur%  | 0           |

**Figure S40.** CHNS elemental analysis of SLM<sub>2</sub>.

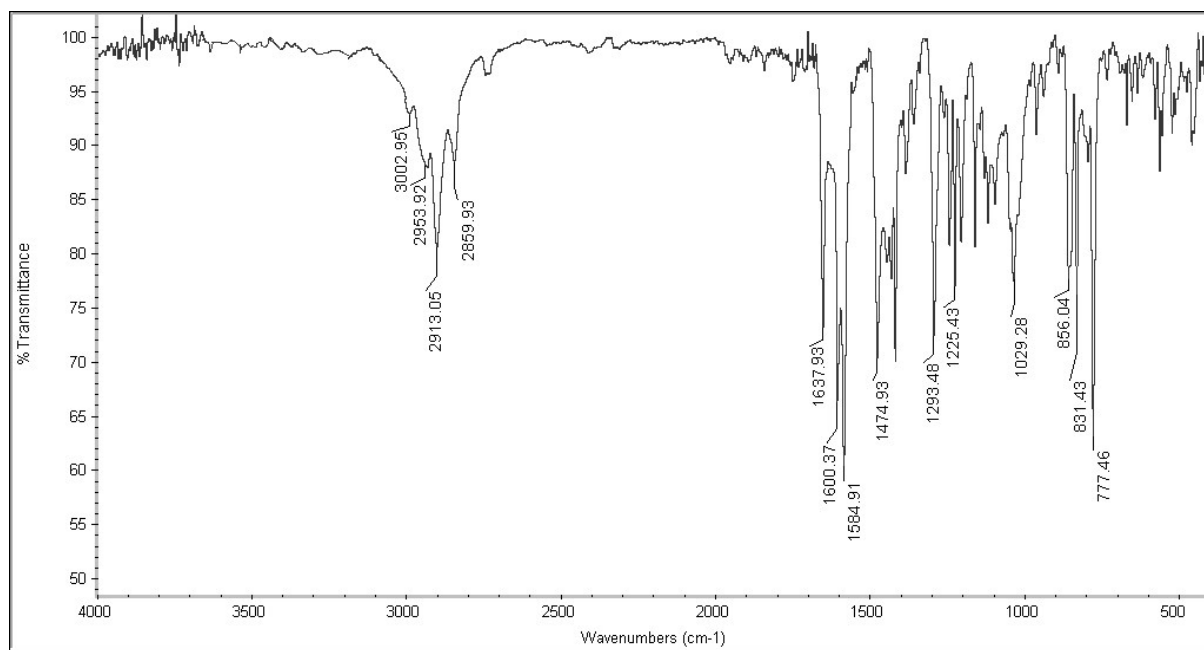

Figure S41. FT-IR spectrum of MC<sub>1</sub>.

Eager 300 Summarize Results

Method Name : NCHS

Method Filename : Copy of Copy of N C H S-bkp .mth

1 Sample(s) in Group No : 1

Component Name Average

```

-----
Nitrogen%      4.230158659
Carbon%        48.29459878
Hydrogen%      4.907647101
Sulphur%       0
  
```

Figure S42. CHNS elemental analysis of MC<sub>1</sub>.

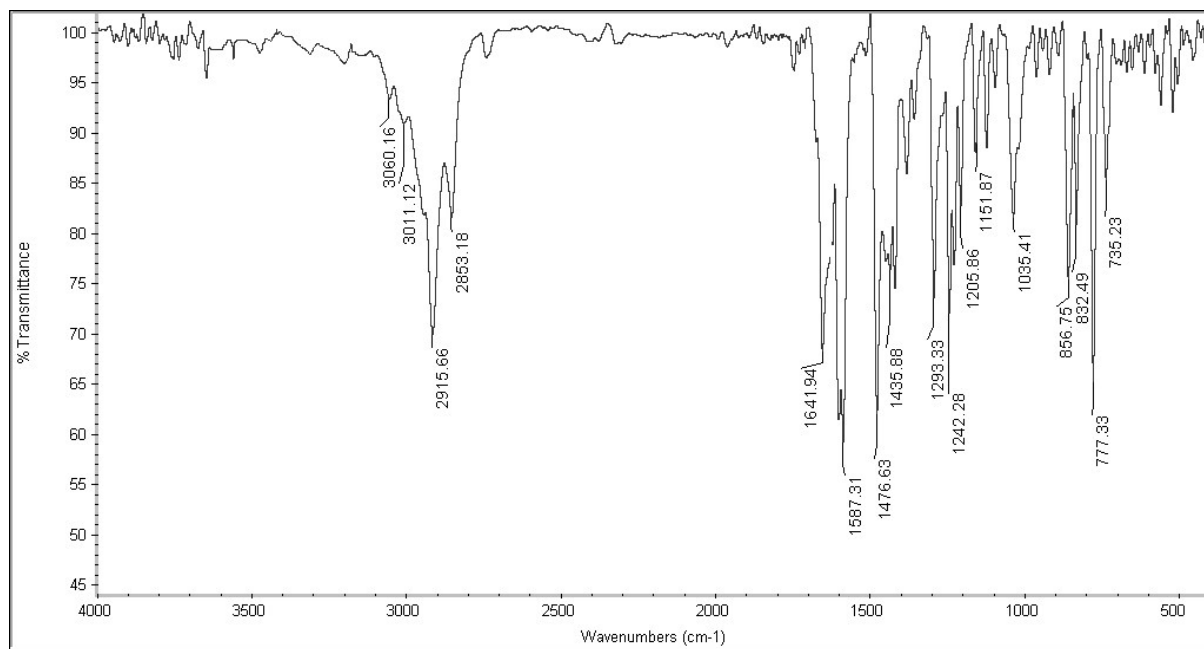

Figure S43. FT-IR spectrum of MC<sub>2</sub>.

Eager 300 Summarize Results

Method Name : NCHS

Method Filename : Copy of Copy of N C H S-bkp .mth

1 Sample(s) in Group No : 3

Component Name Average

| Component Name | Average     |
|----------------|-------------|
| Nitrogen%      | 4.166429696 |
| Carbon%        | 53.23644213 |
| Hydrogen%      | 4.232706965 |
| Sulphur%       | 0           |

Figure S44. CHNS elemental analysis of MC<sub>2</sub>.

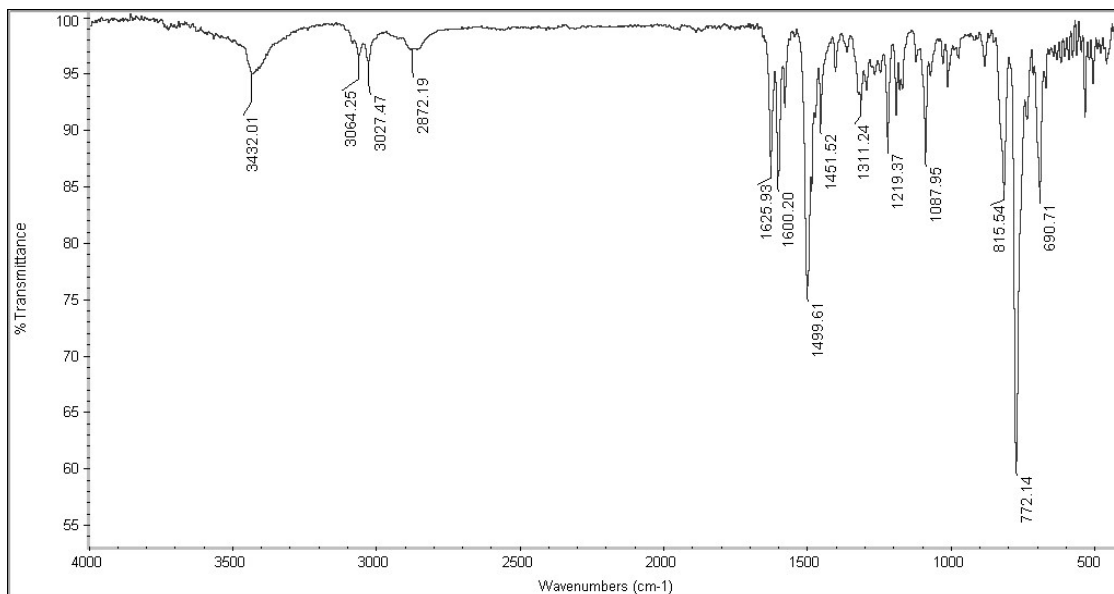

Figure S45. FT-IR spectrum of MC<sub>3</sub>.

Eager 300 Summarize Results

Method Name : NCHS

Method Filename : Copy of Copy of N C H S-bkp .mth

1 Sample(s) in Group No : 13

Component Name Average

| -----     |             |
|-----------|-------------|
| Nitrogen% | 3.911598123 |
| Carbon%   | 59.89036180 |
| Hydrogen% | 5.539784364 |
| Sulphur%  | 0           |

Figure S46. CHNS elemental analysis of MC<sub>3</sub>.

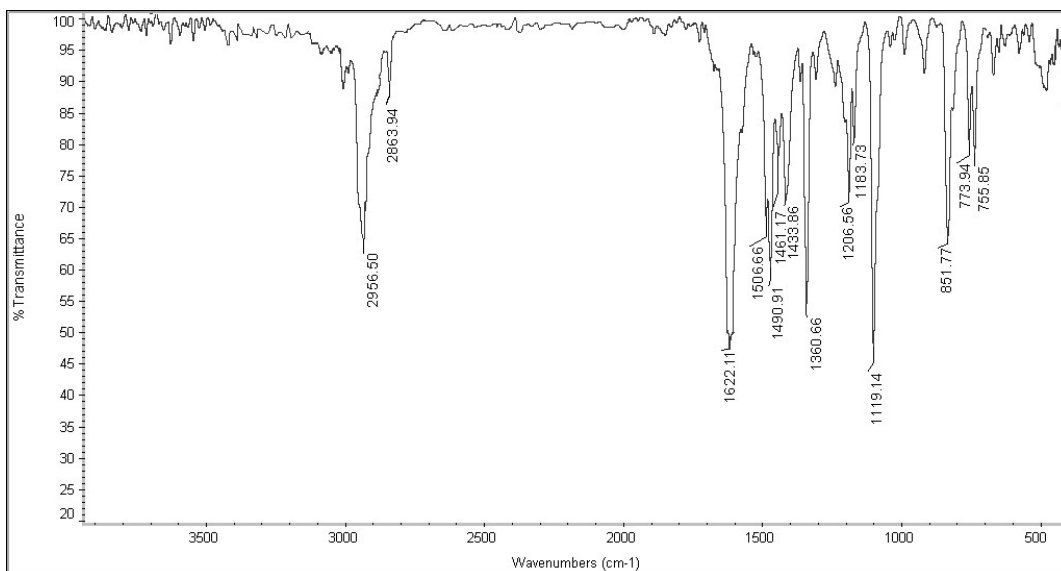

**Figure S47.** FT-IR spectrum of BC<sub>1</sub>.

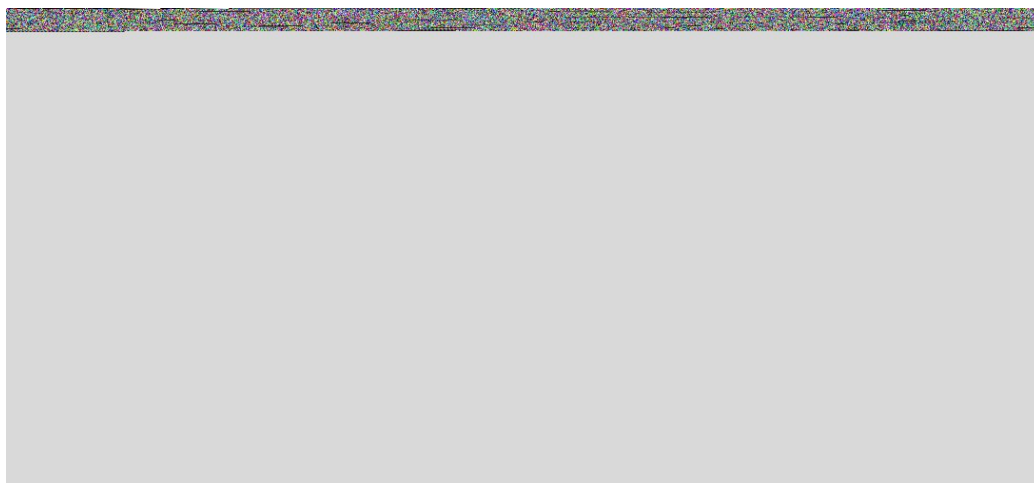

**Figure S48.** CHNS elemental analysis of BC<sub>1</sub>.



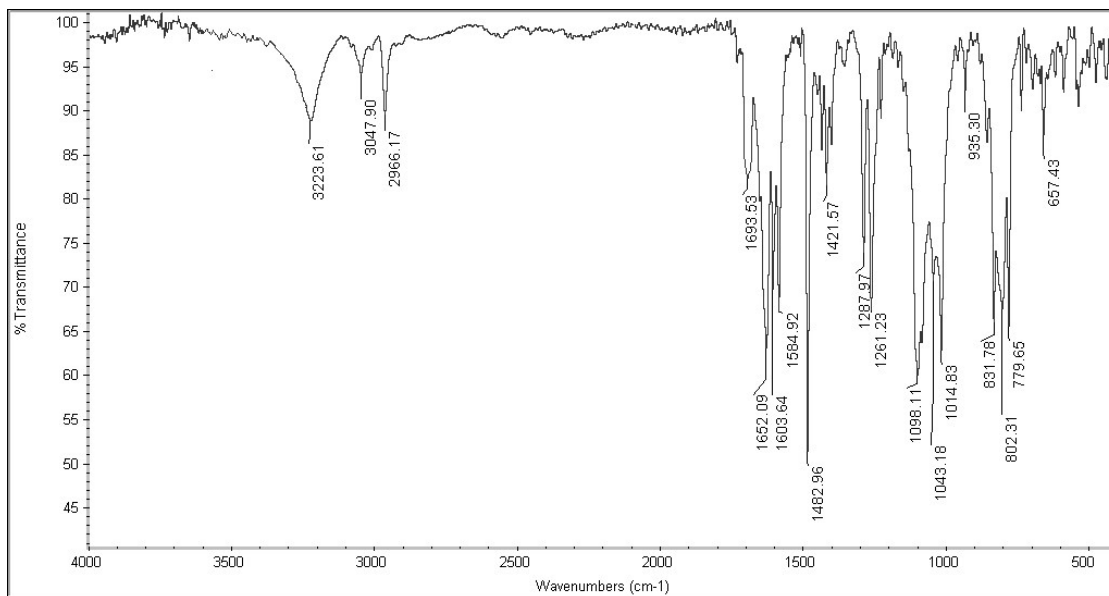

Figure S49. FT-IR spectrum of BC<sub>2</sub>.

Eager 300 Summarize Results

Method Name : NCHS  
 Method Filename : Copy of Copy of N C H S-bkp .mth

1 Sample(s) in Group No : 10

Component Name Average

| -----     |             |
|-----------|-------------|
| Nitrogen% | 4.004838448 |
| Carbon%   | 55.63718384 |
| Hydrogen% | 4.213483986 |
| Sulphur%  | 0           |

Figure S50. CHNS elemental analysis of BC<sub>2</sub>.

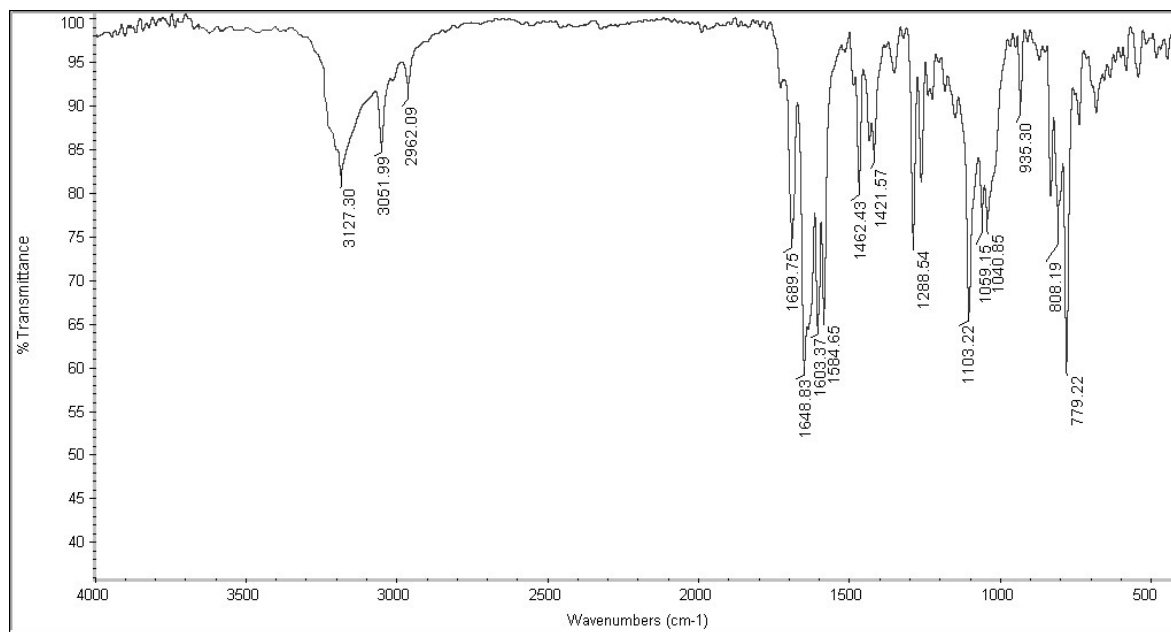

**Figure S51.** FT-IR spectrum of BC<sub>4</sub>.

**Eager 300 Summarize Results**

Method Name : NCHS  
 Method Filename : Copy of Copy of N C H S-bkp .mth

1 Sample(s) in Group No : 11

| Component Name | Average     |
|----------------|-------------|
| Nitrogen%      | 4.894485055 |
| Carbon%        | 49.32840183 |
| Hydrogen%      | 4.970967587 |
| Sulphur%       | 0           |

**Figure S52.** CHNS elemental analysis of BC<sub>4</sub>.

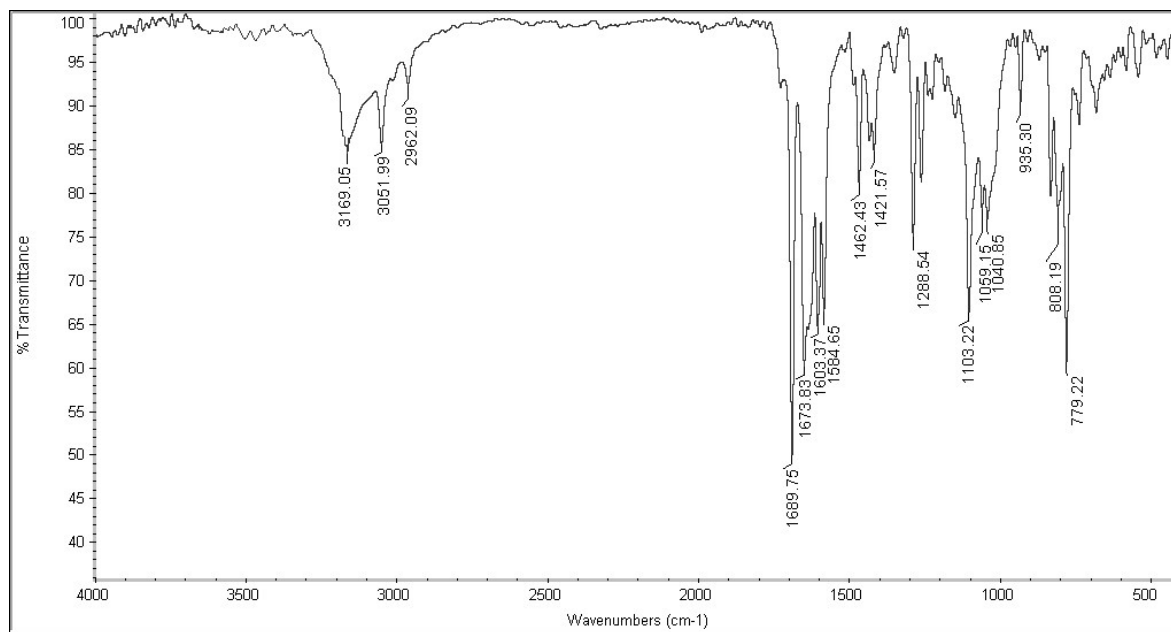

Figure S53. FT-IR spectrum of BC<sub>5</sub>.

Eager 300 Summarize Results

Method Name : NCHS  
 Method Filename : Copy of Copy of N C H S-bkp .mth

1 Sample(s) in Group No : 14

Component Name Average

| Component Name | Average     |
|----------------|-------------|
| Nitrogen%      | 4.212976484 |
| Carbon%        | 56.93104175 |
| Hydrogen%      | 4.237685289 |
| Sulphur%       | 0           |

Figure S54. CHNS elemental analysis of BC<sub>5</sub>.

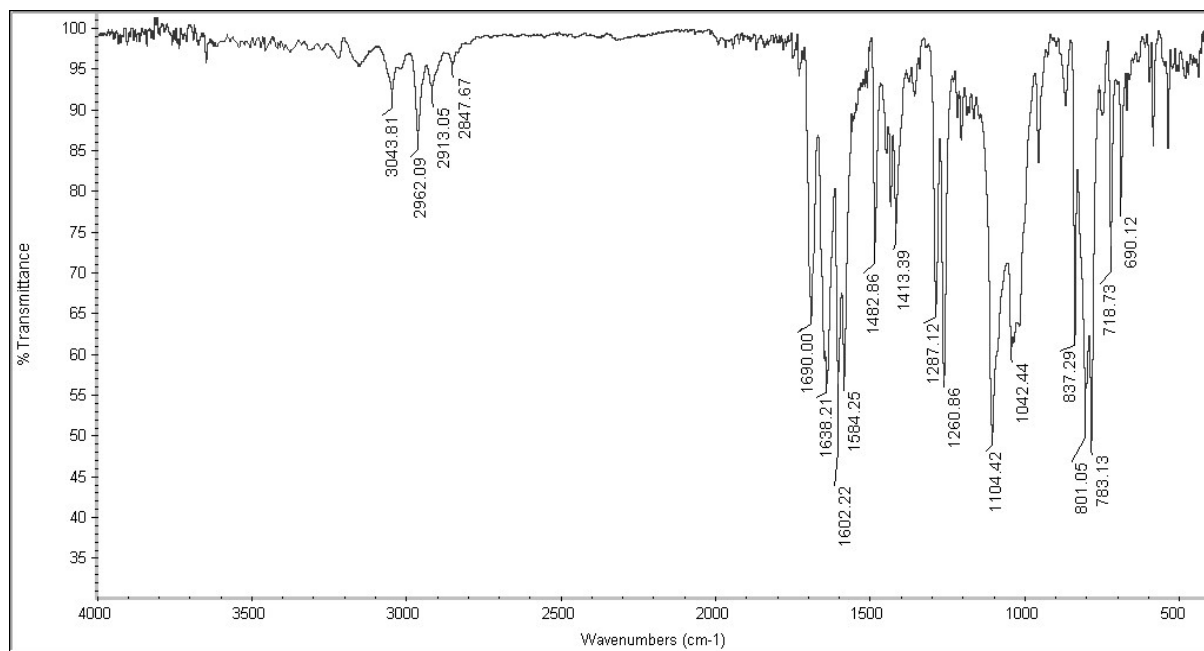

Figure spectrum

S55. FT-IR of BC<sub>6</sub>.

Eager 300 Summarize Results

Method Name : NCHS

Method Filename : Copy of Copy of N C H S-bkp .mth

1 Sample(s) in Group No : 15

Component Name Average

| -----     |             |
|-----------|-------------|
| Nitrogen% | 5.724118040 |
| Carbon%   | 42.68875313 |
| Hydrogen% | 5.147167565 |
| Sulphur%  | 0           |

Figure S56. CHNS elemental analysis of BC<sub>6</sub>.

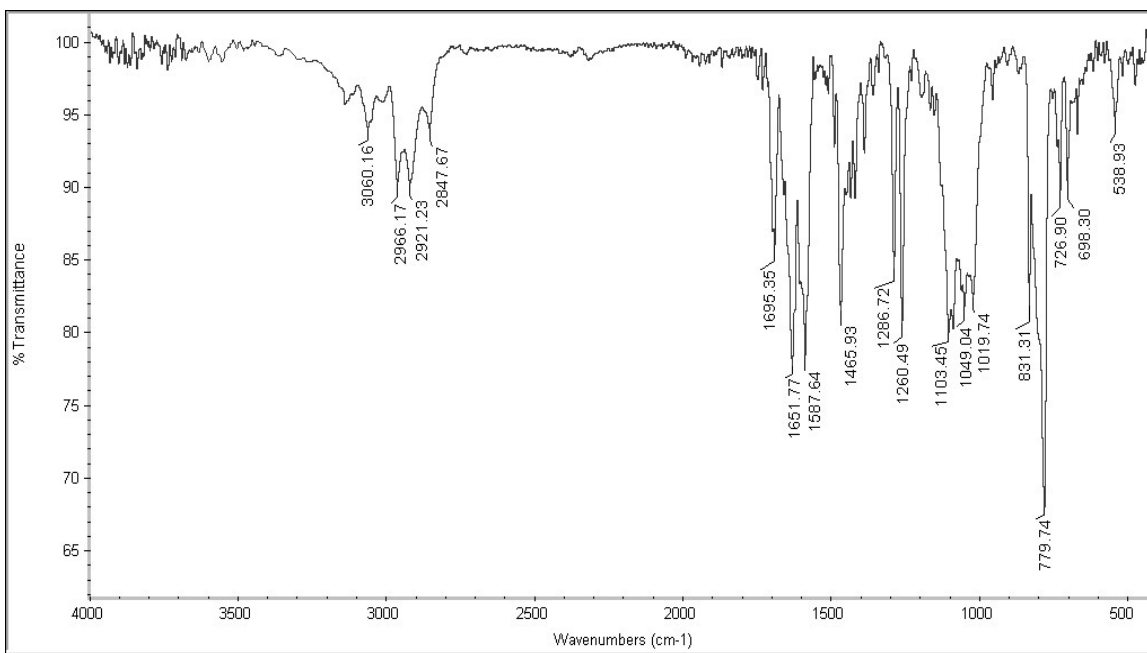

**Figure S57.** FT-IR spectrum of BC<sub>7</sub>.

**Eager 300 Summarize Results**

Method Name : NCHS

Method Filename : Copy of Copy of N C H S-bkp .mth

1 Sample(s) in Group No : 19

Component Name Average

| Component Name | Average     |
|----------------|-------------|
| Nitrogen%      | 5.531579083 |
| Carbon%        | 44.89036197 |
| Hydrogen%      | 5.669702488 |
| Sulphur%       | 0           |

**Figure S58.** CHNS elemental analysis of BC<sub>7</sub>.
